# Supplementary material for: Our journey, our story: a study protocol for the evaluation of a co-design framework to improve services for Aboriginal youth mental health and well-being
Source: PubMed Central journal article supplement — BMJ Open. 2021 May 19;11(5):e042981. doi: 10.1136/bmjopen-2020-042981 (PMC8137218; doi:10.1136/bmjopen-2020-042981), 2021-05-19

# BMJ Open

BMJ Open is committed to open peer review. As part of this commitment we make the peer review history of every article we publish publicly available.

When an article is published we post the peer reviewers' comments and the authors' responses online. We also post the versions of the paper that were used during peer review. These are the versions that the peer review comments apply to.

The versions of the paper that follow are the versions that were submitted during the peer review process. They are not the versions of record or the final published versions. They should not be cited or distributed as the published version of this manuscript.

BMJ Open is an open access journal and the full, final, typeset and author-corrected version of record of the manuscript is available on our site with no access controls, subscription charges or pay-per-view fees (<http://bmjopen.bmj.com>).

If you have any questions on BMJ Open's open peer review process please email [info.bmjopen@bmj.com](mailto:info.bmjopen@bmj.com)

# BMJ Open

## Our Journey, Our Story: A study protocol for the evaluation of a co-design framework to improve services for Aboriginal youth mental health and well being

|                               |                                                                                                                                                                                                                                                                                                                                                                                                                                                                                                                                                                                                                                                                                                                                                                                                                                                                                                                                                                                                                                                                |
|-------------------------------|----------------------------------------------------------------------------------------------------------------------------------------------------------------------------------------------------------------------------------------------------------------------------------------------------------------------------------------------------------------------------------------------------------------------------------------------------------------------------------------------------------------------------------------------------------------------------------------------------------------------------------------------------------------------------------------------------------------------------------------------------------------------------------------------------------------------------------------------------------------------------------------------------------------------------------------------------------------------------------------------------------------------------------------------------------------|
| Journal:                      | <i>BMJ Open</i>                                                                                                                                                                                                                                                                                                                                                                                                                                                                                                                                                                                                                                                                                                                                                                                                                                                                                                                                                                                                                                                |
| Manuscript ID                 | bmjopen-2020-042981                                                                                                                                                                                                                                                                                                                                                                                                                                                                                                                                                                                                                                                                                                                                                                                                                                                                                                                                                                                                                                            |
| Article Type:                 | Protocol                                                                                                                                                                                                                                                                                                                                                                                                                                                                                                                                                                                                                                                                                                                                                                                                                                                                                                                                                                                                                                                       |
| Date Submitted by the Author: | 24-Jul-2020                                                                                                                                                                                                                                                                                                                                                                                                                                                                                                                                                                                                                                                                                                                                                                                                                                                                                                                                                                                                                                                    |
| Complete List of Authors:     | Wright, Michael; Curtin University, School of Occupational Therapy, Social Work and Speech Pathology<br>Brown, Alex; SAHMRI, Indigenous Health<br>Dudgeon, Patricia; The University of Western Australia, School of Indigenous Studies<br>McPhee, Rob; Kimberley Aboriginal Medical Service , Chief Operating Officer<br>Coffin, Juli; Telethon Kids Institute<br>Pearson, Glenn; Telethon Kids Institute, Aboriginal Health Institute Leadership Team<br>Lin, Ashleigh; Telethon Institute for Child Health Research<br>Newnham, Elizabeth; Curtin University, School of Psychology<br>King Baguley, Kiarnee; headspace Broome<br>Webb, Michelle ; Curtin University, School of Occupational Therapy, Social Work and Speech Pathology<br>Sibosado, Amanda; Curtin University, School of Occupational Therapy, Social Work and Speech Pathology<br>Crisp, Nikayla; Curtin University, School of Occupational Therapy, Social Work and Speech Pathology<br>Flavell, Helen; Curtin University, School of Occupational Therapy, Social Work and Speech Pathology |
| Keywords:                     | Change management < HEALTH SERVICES ADMINISTRATION & MANAGEMENT, Health & safety < HEALTH SERVICES ADMINISTRATION & MANAGEMENT, Quality in health care < HEALTH SERVICES ADMINISTRATION & MANAGEMENT                                                                                                                                                                                                                                                                                                                                                                                                                                                                                                                                                                                                                                                                                                                                                                                                                                                           |
|                               |                                                                                                                                                                                                                                                                                                                                                                                                                                                                                                                                                                                                                                                                                                                                                                                                                                                                                                                                                                                                                                                                |

SCHOLARONE™  
Manuscripts

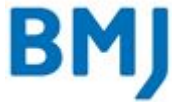

I, the Submitting Author has the right to grant and does grant on behalf of all authors of the Work (as defined in the below author licence), an exclusive licence and/or a non-exclusive licence for contributions from authors who are: i) UK Crown employees; ii) where BMJ has agreed a CC-BY licence shall apply, and/or iii) in accordance with the terms applicable for US Federal Government officers or employees acting as part of their official duties; on a worldwide, perpetual, irrevocable, royalty-free basis to BMJ Publishing Group Ltd ("BMJ") its licensees and where the relevant Journal is co-owned by BMJ to the co-owners of the Journal, to publish the Work in this journal and any other BMJ products and to exploit all rights, as set out in our [licence](#).

The Submitting Author accepts and understands that any supply made under these terms is made by BMJ to the Submitting Author unless you are acting as an employee on behalf of your employer or a postgraduate student of an affiliated institution which is paying any applicable article publishing charge ("APC") for Open Access articles. Where the Submitting Author wishes to make the Work available on an Open Access basis (and intends to pay the relevant APC), the terms of reuse of such Open Access shall be governed by a Creative Commons licence – details of these licences and which [Creative Commons](#) licence will apply to this Work are set out in our licence referred to above.

Other than as permitted in any relevant BMJ Author's Self Archiving Policies, I confirm this Work has not been accepted for publication elsewhere, is not being considered for publication elsewhere and does not duplicate material already published. I confirm all authors consent to publication of this Work and authorise the granting of this licence.

1  
2  
3  
4  
5 **Our Journey, Our Story: A study protocol for the evaluation of a co-design framework**  
6  
7  
8 **to improve services for Aboriginal youth mental health and wellbeing**  
9  
10

11  
12 Corresponding author: **Associate Professor Michael Wright**  
13  
14 School of Occupational Therapy, Social Work and Speech  
15  
16 Pathology, Curtin University, GPO Box U1987, Perth Western  
17  
18 Australia, Australia 6845  
19  
20 Email: [m.wright@curtin.edu.au](mailto:m.wright@curtin.edu.au)  
21  
22  
23  
24 Tel: 61 8 9266 1637 (no Fax number available)  
25

26 Co-authors **Professor Alex Brown**  
27  
28 South Australian Health and Medical Research Institute,  
29  
30 Adelaide, South Australia, Australia  
31  
32  
33 **Professor Pat Dudgeon**  
34  
35 The University of Western Australia  
36  
37 Perth, Western Australia, Australia  
38  
39  
40 **Mr Rob McPhee**  
41  
42 Kimberley Aboriginal Medical Services  
43  
44 Broome, Western Australia, Australia  
45  
46  
47 **Professor Juli Coffin**  
48  
49 Telethon Kids Institute  
50  
51 Broome, Western Australia, Australia  
52  
53  
54 **Mr Glenn Pearson**  
55  
56 Telethon Kids Institute  
57  
58 Nedlands, Perth, Western Australia, Australia  
59  
60

**Associate Professor Ashleigh Lin**

Telethon Kids Institute

Nedlands, Perth, Western Australia, Australia

**Dr Elizabeth Newnham**

Curtin University, Perth, Western Australia, Australia

Ms Kiarnee King Baguley

headspace Broome

Broome, Western Australia, Australia

**Ms Michelle Webb**

Curtin University

Perth, Western Australia, Australia

**Ms Amanda Sibosado**

Curtin University

Perth, Western Australia, Australia

**Ms Nikayla Crisp**

Curtin University

Perth, Western Australia, Australia

**Dr Helen Flavell**

Curtin University

Perth, Western Australia, Australia

Source of support:

Australian Government Medical Research Future Fund (MRFF)  
as part of the Million Minds Mental Health Research Mission  
(MRF1178972).

Keywords:

health services, change management, health and safety, quality  
in health care, first nations

1  
2  
3 Word count: 3966 excluding title page, references and figure  
4  
5  
6  
7

8 Number of figures and tables: 1  
9  
10  
11  
12  
13  
14  
15  
16  
17  
18  
19  
20  
21  
22  
23  
24  
25  
26  
27  
28  
29  
30  
31  
32  
33  
34  
35  
36  
37  
38  
39  
40  
41  
42  
43  
44  
45  
46  
47  
48  
49  
50  
51  
52  
53  
54  
55  
56  
57  
58  
59  
60

For peer review only

## ABSTRACT

**Introduction:** Mental health services are failing to meet the needs of Aboriginal young people in Australia. Despite the investment of resources, improvements in wellbeing have not materialised. A new culturally and age appropriate way of working is required to improve service access and responsiveness. This study will bring Aboriginal Elders, youth and service staff together to build and sustain relationships, review current service models, and co-design new services and evaluation tools. Youth mental health services in Western Australia have committed to partnering with local Elders and young people to improve their capacity for culturally responsive and age appropriate services.

**Methods and analysis:** To allow services and clinical models to evolve, participatory action research grounded in Aboriginal methodologies will be adopted. This involves engaging Elders, young people and service staff as co-researchers. A decolonising, strengths-based framework will be applied to create the conditions for engagement. It foregrounds experiential learning and Aboriginal ways of working to establish relationships and deepen non-Aboriginal co-researchers' knowledge and understanding of local, place-based cultural practices. Once relationships are established, co-design workshops will occur at each site location directed by local Elders. Locally co-designed evaluation measures will assess any changes to community perceptions of youth mental health services and the enablers and barriers to service engagement.

**Ethics and dissemination:** The research has been approved by the Western Australian Aboriginal Health Ethics Committee and honours and privileges Aboriginal voices. Involving Elders and young people in co-design across Western Australia will ensure rapid research translation and knowledge exchange. Transferability of the outcomes will occur across the youth mental health sector through the involvement of key Aboriginal and non-Aboriginal organisations including youth mental health services, peak mental health bodies and

1  
2  
3 consumer groups. Findings will be disseminated via community reports and events, peer-  
4  
5 reviewed journal articles, conference presentations, and social and mainstream media.  
6  
7  
8  
9

10 **Keywords:** Aboriginal mental health, access to health care, youth, community participation,  
11  
12 relationships  
13  
14  
15  
16

17 **Strengths and limitations of this study:**  
18

- 19  
20 • The project approach draws on the strength, wisdom and knowledge of Aboriginal  
21  
22 Elders and young people within local areas.  
23  
24 • Indigenous methodologies and participatory action research approaches enhances  
25  
26 respect for local Aboriginal traditions, customs and cultural worldview.  
27  
28 • Co-designing with youth mental health services has the potential for comparability  
29  
30 and national generalisability, however, there is also potential tension between  
31  
32 standardised models of care and ensuring that local community needs and cultural  
33  
34 practices guide model development.  
35  
36 • Partnerships with peak bodies and service providers facilitates rapid policy change.  
37  
38 • The project benefits from being led by highly-respected Aboriginal researchers who  
39  
40 will bring their unique insight to facilitate two-way knowledge exchange.  
41  
42  
43  
44  
45  
46  
47  
48  
49  
50  
51  
52  
53  
54  
55  
56  
57  
58  
59  
60



## INTRODUCTION

Colonial policies resulting in the systematic loss of land, language, culture, family connection and spiritual identity have had cumulative and intergenerational effects for Aboriginal<sup>1</sup> peoples in Australia.[1, 2, 3] Young people can be particularly vulnerable to the ongoing impact of colonisation, evidenced by the continued removal of children from their families into the care of non-Aboriginal people.[4] Despite significant resilience, Aboriginal young people in Australia face heightened risk for poor mental health [5], with Aboriginal children and adolescents aged 5-17 years dying from suicide at five times the rate of non-Aboriginal young people.[6]

Mental health systems, policies and practices continue to reinforce colonial ideologies in service provision.[7] The legacy of past and present legislation and policies, government interventions and current approaches to service provision, and a lack of truth telling about the shared history of Australia, have resulted in Aboriginal people mistrusting institutions including mainstream health services.[8] Self-determination is critical to the provision of mental health services for Aboriginal people but is lacking from policy and practice.[9] Culturally secure health service delivery must, therefore, incorporate Aboriginal cultural practices, but also—very importantly—address the lack of trust between mainstream health services and their staff, and Aboriginal people, their families and communities.[10, 11]

Building the cultural capability of non-Aboriginal health professionals to increase the accessibility, responsiveness, and cultural security [12] of mainstream services is essential to improve outcomes for Aboriginal people.[13] This is particularly important given the limited

---

<sup>1</sup> The term 'Aboriginal' has been used in this article to refer to both the Aboriginal and Torres Strait Islander peoples of Australia. Our intention in using 'Aboriginal' is to acknowledge the significance of place and that this project will be conducted on Aboriginal country in Western Australia with different clan groups. The authors acknowledge that Aboriginal and Torres Strait Islander peoples may identify with their local clan or group name and mean no disrespect in using the term Aboriginal.

1  
2  
3 numbers of Aboriginal health service staff in the sector.[14] However, terminology  
4  
5 surrounding cultural capability is highly variable and there is a tendency to rely on cultural  
6  
7 awareness training for non-Aboriginal health professionals which can essentialise Indigeneity  
8  
9 and does little to change the organisational culture of the health system.[15] It is now widely  
10  
11 acknowledged that cultural capability development is a continuum that occurs over time  
12  
13 through ongoing contact to foster and build meaningful relationships that lead to greater  
14  
15 understanding and respect for culture, whatever that culture might be. [10, 15]  
16  
17

18  
19 National and state policy documents on Aboriginal mental health emphasise the importance  
20  
21 of strengths-based, community-led primary mental health and social and emotional wellbeing  
22  
23 services [13, 16], however, there is still minimal progress to increasing the accessibility of  
24  
25 mainstream mental health services to improve the wellbeing of Aboriginal young people.[13]  
26  
27 More recently, government policy has emphasised co-designed responses to health inequities  
28  
29 characterised by equal partnerships (see for example, [17]). What is lacking, however, is  
30  
31 information on how to engage in culturally secure co-design processes that address the issues  
32  
33 of colonialism, power inequalities, racism, white privilege and unconscious bias, and the high  
34  
35 level of mistrust of non-Aboriginal people and their institutions.[10, 18] To meaningfully co-  
36  
37 design and reframe non-Aboriginal responses to health inequities and improve the  
38  
39 accessibility and responsiveness of mainstream health services, a decolonising process must  
40  
41 be undertaken.[10, 19]  
42  
43  
44  
45  
46

47  
48 This research addresses the lack of cultural security (which impacts on the accessibility and  
49  
50 responsiveness of youth mental health services) and the shortage of evaluation tools to  
51  
52 determine the effectiveness of services in meeting the needs of Aboriginal young people. The  
53  
54 intended outputs and outcomes will be achieved through meaningful partnerships with local  
55  
56 Aboriginal Elders, young people and youth mental health service staff working together to  
57  
58 co-design appropriate clinical models, system change interventions and evaluation tools.  
59  
60

1  
2  
3 Unique to this project is the drawing together of cultural protocols and research to develop  
4 innovative, decolonised service provision to improve social and emotional wellbeing for  
5  
6 Aboriginal youth.  
7  
8  
9

### 10 **Steady Walking Talking co-design framework**

11  
12 The Steady Walking Talking co-design framework (Figure 1) will direct the research to  
13 privilege Aboriginal ways of working.[20] The framework addresses the importance of trust  
14 and is decolonising, strengths-based and proven to facilitate relationships to build the  
15 capability and confidence of non-Aboriginal people to change health service organisational  
16 culture. It was developed, tested and validated over seven years of participatory action  
17 research with Nyoongar Elders in metropolitan Perth.[20]  
18  
19  
20  
21  
22  
23  
24  
25

26  
27 {Insert Figure 1 }  
28  
29

30 The seven elements of the co-design framework (see Figure 1) are supported through  
31 immersive experiential learning sessions led and held by Elders as the cultural knowledge  
32 authorities (described in detail under Methods). The framework was developed as one of  
33 three foundational components of a larger decolonising systemic change framework [20], and  
34 subsequently applied to improve the delivery of Aboriginal youth mental health services.[8]  
35 Findings from prior research indicate that engaging with a service can either begin to build  
36 trust and mutual understanding or, alternatively, confirm that the service is  
37 untrustworthy.[21] The process for building relationships takes time and is circular rather  
38 than didactic and linear. Importantly, service staff need to be present and open to learning  
39 with humility.[21]  
40  
41  
42  
43  
44  
45  
46  
47  
48  
49  
50  
51  
52

## 53 **METHODS AND ANALYSIS**

### 54 **Study Aims**

55  
56  
57  
58  
59  
60

1  
2  
3 This research aims to enhance the capacity of mainstream youth mental health service  
4 providers to be flexible, confident and competent when responding to the needs of Aboriginal  
5 young people. Specifically, the study will establish an evidence base for optimal youth  
6 mental health service accessibility and responsiveness to improve the social, emotional and  
7 mental wellbeing of Aboriginal young people. To achieve this outcome, the Steady Walking  
8 and Talking co-design framework will be implemented across metropolitan Perth and  
9 regional Western Australia locations with different language and clan groups. The co-  
10 designed youth mental health service intervention focused on increasing service cultural  
11 security will then be evaluated to measure the impact on organisations and service outcomes.  
12  
13 The research will harness the cultural leadership of Aboriginal Elders and young people to  
14 alter the way services work with and for Aboriginal youth, their families and communities  
15 by:

- 16 1. Applying the co-design framework at each site in Western Australia so that local  
17 Elders, young people and youth mental health service staff can build and sustain  
18 relationships.
- 19 2. Co-designing governance structures, culturally secure clinical practices, community  
20 engagement and workforce strategies with local Aboriginal Elders, young people and  
21 service staff.
- 22 3. Evaluating the impact of the changes to systems and work practices on community  
23 perceptions, and the accessibility and responsiveness of youth mental health services  
24 and their effectiveness in meeting the needs of Aboriginal young people from  
25 different cultural groups.
- 26 4. To ensure cultural and age appropriate services and systems changes have occurred.  
27  
28 The evaluation measures will also be locally co-designed with Elders and young  
29 people.

1  
2  
3 Accordingly, the research aims to answer the following questions:  
4  
5

- 6 1. How does the Steady Walking and Talking framework establish trust so that services  
7 and community can work together in each region?  
8
- 9 2. How do the key attributes of a culturally secure health service that meets the needs of  
10 young Aboriginal people differ across Aboriginal cultural groups?  
11
- 12 3. How do the key criteria of a culturally secure youth mental health service evaluation  
13 differ across Aboriginal cultural groups?  
14
- 15 4. Has the framework resulted in more young Aboriginal people accessing these mental  
16 health services and with greater levels of satisfaction with the partner services?  
17  
18  
19  
20  
21  
22  
23  
24

## 25 **Study Design**

26  
27 Participatory action research grounded in Indigenous research methodologies [22-24] will be  
28 adopted to allow services and clinical models to evolve during the project. Aboriginal  
29 research and evaluation must respect Aboriginal worldviews, and be responsive to the self-  
30 determined intentions, priorities and drivers expressed by Aboriginal people.[25]  
31

32  
33 Participatory action research aligns with cultural practices and emphasises mutual respect and  
34 co-learning; individual and community building; systems change; and a balance between  
35 research and action. [24, 26] Through participatory action research, Elders, young people and  
36 service staff will be engaged as co-researchers. The research will be characterised by cyclical,  
37 dynamic and reflective processes, and the iterative nature of research design and  
38 implementation promotes success. [26]  
39  
40  
41  
42  
43  
44  
45  
46  
47  
48  
49  
50

## 51 **Community Involvement**

52  
53 The research foregrounds and privileges Aboriginal ways of knowing, doing and being. The  
54 Steady Walking Talking co-design framework was created through community involvement  
55 and underpinned by the cultural authority of Elders who held the developmental process. The  
56  
57  
58  
59  
60

1  
2  
3 use of participatory action research will ensure that the perspectives of Aboriginal people are  
4 prioritised throughout all stages including translation and dissemination activities. Trusting  
5 and meaningful relationships are crucial as they will enable non-Aboriginal co-researchers to  
6 deepen their understanding of culture and spirit to inform meaningful changes to service  
7 delivery. To ensure local cultural practices are respected and followed, the research team will  
8 be guided by local Elders and young people at each site on how to implement the co-design  
9 sessions. Throughout the study there will be regular opportunities for the community  
10 members to provide feedback.  
11  
12  
13  
14  
15  
16  
17  
18  
19  
20

### 21 **Setting and Participants**

22  
23 The project runs from June 2019 to May 2024 and will be undertaken across metropolitan  
24 Perth and regional Western Australia in partnership with local *headspace* centres (henceforth  
25 referred to as sites). *headspace* is a federal government-funded youth mental health service  
26 that operates nationally with more than 110 centres offering tailored psychological  
27 intervention. Three groups of participants will be recruited at each site:  
28  
29  
30  
31  
32  
33  
34  
35

36  
37 *1. Elders, young people and headspace staff.* These participants will be co-researchers and  
38 involved in co-design workshops at each site. Approximately 3-5 local Elders<sup>2</sup> (traditional  
39 owners where each of the *headspace* centres are located) and 3-5 young people (ages 16-25)  
40 will be invited to participate as co-researchers. Exclusion criteria include anyone under the  
41 age of 16 years and individuals acutely unwell with mental health difficulties, or persons with  
42 dependent relationships (such as those currently receiving treatment from the mental health  
43 partner services). It is vital that *headspace* co-researchers come from all levels of the  
44 organisation, including executives, clinical, allied and administrative staff (approximately 3-5  
45 from each partner service site). Although confidentiality will be maintained, co-researchers,  
46  
47  
48  
49  
50  
51  
52  
53  
54  
55  
56  
57  
58

---

59 <sup>2</sup> Please note, male and female representation for all participant groups will reflect local cultural protocols/context and will be determined  
60 through consultation with local communities through the co-researchers.

1  
2  
3 due to their high-profile role in the co-design process, will be identifiable to other co-  
4  
5 researchers and community members. Comprehensive culturally relevant information sheets  
6  
7 in plain language will be provided to ensure informed consent for all aspects of involvement  
8  
9 in the research. In addition, all co-researchers will be provided with regular updates on the  
10  
11 research activities and opportunities to provide feedback. Co-researchers will be invited to be  
12  
13 involved in writing publications and conference presentations.  
14  
15

16  
17 *2. Clients at headspace centres.* Quantitative data will be collected from each of the  
18  
19 *headspace* sites. These data will be routinely collected and de-identified to maintain client  
20  
21 confidentiality. For example, data will include the number of Aboriginal young people  
22  
23 triaged by each service; the number accepted by the service or referred elsewhere; and the  
24  
25 median length of engagement with the service. Of note, due to the participatory action  
26  
27 research methodology, the co-design process may point to other measures of service  
28  
29 evaluation for which an ethics amendment will be sought.  
30  
31

32  
33 *3. Local Aboriginal community members.* Community perceptions of *headspace* centres will  
34  
35 be collected from an additional group of Aboriginal community members who provide  
36  
37 informed consent. Approximately twenty people per site will be invited to participate in in-  
38  
39 depth community yarning [27] interviews which will be audio recorded and transcribed.  
40  
41

## 42 43 **Methods & Planned Analyses**

44  
45 Research activities conducted at each site will follow participatory action research principles  
46  
47 to ensure the research is guided by the community. Therefore, recruitment and engagement at  
48  
49 each site will be informed by local cultural practices, context and needs and draw on existing  
50  
51 relationships between investigators and the community members. Of note, seven of the ten  
52  
53 investigators are highly respected Aboriginal researchers with cultural connections across  
54  
55 Western Australia.  
56  
57  
58  
59  
60

### *Engagement*

Co-researchers will be recruited through the investigators' networks and existing relationships and, where appropriate, forums will be held to inform community members of the project and promote recruitment of the Elder and young co-researchers. Relevant staff from each of the participating *headspace* centres will be recruited internally.

### *Preparation for Working Together and Co-design Workshops*

A series of workshops will be hosted in each site. . As part of the preparation for co-design, Elders, young people and service staff will meet regularly for cultural teaching and mentoring including Shared Storying and On Country experiential learning. As the name suggests, Shared Storying provides a safe space for Aboriginal and non-Aboriginal people to share their stories and histories without judgement and is a conduit for appreciating the impact of colonisation on health, wellbeing and identity.[20] Research has shown that the Shared Storying can deepen and sustain relationships over the course of a project.[8] Shared Storying provides the foundation for the subsequent On Country experience with Elders and provides the next steps for deepening relationships. This occurs through the experience of hearing and being shown how culture is experienced through the stories of being On Country.[8, 23] After establishing a strong foundation for working together, participants are ready for the co-design workshops which will focus on changing work practices to increase Aboriginal youth engagement in mental health services and inform the development of outcome and fidelity indicators. The co-design workshops will also function to monitor service efforts to improve their access and responsiveness. Workshop discussions will be audio-recorded and transcribed and supplemented by observation notes. Qualitative data analysis will employ an inductive approach, consistent with the principles of thematic content analysis.[28] Two researchers (one Aboriginal and one non-Aboriginal) will code the data, and cross-code 10% of the dataset to establish inter-rater reliability.[29] The initial themes will be presented to the



1  
2  
3 co-researchers (Elders, young people and service staff co-researchers) for member checking  
4  
5 before comprehensive coding and thematic analysis is undertaken.  
6  
7

#### 8 9 *Clients at headspace centre sites*

10  
11 Service data will be collated and analysed to track changes to service accessibility and  
12  
13 responsiveness. Demographic and service use data for Aboriginal clients will be analysed to  
14  
15 examine: accessibility (i.e. how many are attending services), demographics (i.e. who is  
16  
17 attending services), acceptability (i.e. length of time engaged), responsiveness (i.e. type of  
18  
19 services provided), severity at intake (i.e. how unwell are youth at presentation), and  
20  
21 satisfaction (i.e. satisfaction with the services). Data will be analysed at baseline and annually  
22  
23 to assess whether the co-design process results in improvements to accessibility,  
24  
25 acceptability, intake severity and satisfaction.  
26  
27  
28

#### 29 30 31 *Community Assessment*

32  
33 In-depth yarning interviews and/or focus groups will assess the local Aboriginal community's  
34  
35 perceptions of *headspace* centres, and the enablers and barriers to service engagement.  
36  
37 Yarning is culturally informed method of qualitative data collection [27] using semi-  
38  
39 structured neutral, open-ended questions that adhere to Aboriginal protocols. The community  
40  
41 assessment may include co-designed quantitative measures to assess service access and  
42  
43 responsiveness. Qualitative data will be analysed using thematic content analysis (described  
44  
45 above for co-design workshops) to determine culturally nuanced expressions of distress,  
46  
47 factors associated with engagement, and barriers to access.  
48  
49  
50

#### 51 52 53 *Cost-effectiveness Analysis*

54  
55 Cost-effectiveness will be assessed by comparing any additional costs to provide a culturally  
56  
57 appropriate service with the benefits that accrue following implementation. Costs will derive  
58  
59 from the additional resources necessary, including authentic and ongoing engagement with  
60

1  
2  
3 Elders and young people, which will be measured using the service metrics provided by  
4  
5 *headspace* centres. Benefits will comprise the reduction in acute mental health episodes,  
6  
7 increase in psychosocial functioning, and engagement and uptake of employment and  
8  
9 education. This data also provides an indicator of service effectiveness, which can predict  
10  
11 longer term outcomes such as suicides prevented. Data can subsequently be modelled to  
12  
13 calculate cost-effectiveness in terms of cost per life year gained.  
14  
15

## 16 17 **ETHICS AND DISSEMINATION** 18

19  
20 Two documents produced by the National Health and Medical Research Council of Australia  
21  
22 underpin the design of this research: Ethical conduct in research with Aboriginal and Torres  
23  
24 Strait Islander peoples and communities: Guidelines for researchers and stakeholders [30],  
25  
26 and Keeping Research on Track II: A companion document to Ethical conduct in research  
27  
28 with Aboriginal and Torres Strait peoples and Communities: Guidelines for researchers and  
29  
30 stakeholders.[31]  
31  
32

33  
34 Approval has been obtained from the Kimberley Aboriginal Health Planning Forum  
35  
36 Kimberley Research Subcommittee and the Western Australian Aboriginal Health Ethics  
37  
38 Committee (HREC 955) with reciprocal approval from the Curtin University Human  
39  
40 Research Ethics Committee (HRE2020-0023). Ethical and respectful engagement with  
41  
42 communities will be guided by the Elder and youth co-researchers, and consideration has  
43  
44 been given to the role of caregivers. We have developed safety protocols in the event of  
45  
46 participant distress, which reflect the context, needs and local mental health resources. All  
47  
48 researchers conducting interviews or focus groups will have training in Aboriginal mental  
49  
50 health first aid. Ethics has been approved for images and video recordings to be taken for use  
51  
52 in community reports. Aboriginal co-researchers will be properly compensated for their  
53  
54 expertise and time throughout the research project.  
55  
56  
57  
58  
59  
60

### Dissemination

The active involvement of Aboriginal Elders and young people alongside service staff in co-design will ensure the rapid translation of study outcomes. Their collective involvement through all research stages provides the ideal conditions for knowledge exchange to occur across the sector. Research translation in this study is twofold. First, it will be guided and held by Aboriginal knowledge through the Elders and young people within each regional and cultural context. Second, the translation and dissemination of findings will be designed and directed by the participants, particularly young co-researchers. This participatory approach ensures the commitment of all stakeholders to implement the findings as well as their ownership of the ensuing process and outcomes.

The transferability of the implementation and evaluation outcomes will be enhanced by the leadership of the Aboriginal Health Council of Western Australia, the Western Australian Primary Health Alliance, the Western Australian Country Health Services, the Western Australian Mental Health Commission, *headspace* National Youth Mental Health Foundation and *headspace* managers at each of the sites. Together they will form the project's Policy and Governance Group with an Elder and young person representative. This group will take carriage of the policy and governance implications of the research, disseminating and translating the findings into policy and governance across the sector.

In addition, the following dissemination activities will be undertaken to ensure broad uptake of the results:

- Annual reports, information sheets and newsletters will be distributed to community members and the sector.
- A community translation forum will be convened in each site in the final year of the study.

- 1  
2  
3 • A co-designed media campaign with Aboriginal young people will be undertaken to  
4 extend translation impact for Aboriginal young people.  
5  
6
- 7  
8 • Workshops led by Elder and young co-researchers will be held for policy makers  
9  
10 from key organisations including: the Commissioner for Children and Young People  
11  
12 Western Australia, the Youth Affairs Council of Western Australia, the Aboriginal  
13  
14 Health Council of Western Australia, the Western Australian Mental Health  
15  
16 Commission, the Western Australian Department of Health, Department for Child  
17  
18 Protection and Family Support, Police Force, and Education Department.  
19
- 20  
21 • The partnership with *headspace* National and Western Australian *headspace* centres  
22  
23 provides the opportunity to deliver a state network of services with significantly  
24  
25 increased ability to meet the needs of Aboriginal young people. To ensure the findings  
26  
27 are used in health promotion and policy, the research team will produce a manual  
28  
29 containing implementation guidelines for study findings. Training on how to apply the  
30  
31 study findings will delivered to services and policy organisations.  
32  
33
- 34  
35 • Peer and non-peer reviewed publications will add to the existing body of knowledge.  
36  
37
- 38 • Seminars will be presented at local and national organizations and universities, and at  
39  
40 representative peak organizations to highlight findings and promote their uptake.  
41  
42
- 43 • Presentations will also be given at relevant local, national and international  
44  
45 conferences, and wherever possible, with Elders and young people as co-presenters.  
46  
47
- 48 • Closed briefings will be provided to state and national politicians and senior  
49  
50 executives of mental health services for Aboriginal communities and young people.  
51

## 52 CONCLUSION

53  
54  
55 The implementation and evaluation of the Steady Walking Talking framework—guided by  
56  
57 local Aboriginal Elders and young people as co-researchers—will improve youth mental  
58  
59 health services' access and effectiveness for Aboriginal youth through enabling system and  
60

1  
2  
3 work practice changes. The framework is a decolonising process that will provide the  
4  
5 conditions to empower Aboriginal Elders and young people to drive youth mental health  
6  
7 service change. All participating organisations will invest in building the capacity of  
8  
9 identified key staff who will promote, implement and sustain attitudinal, behavioural and  
10  
11 systems change within their organisation. Service staff will develop greater confidence and a  
12  
13 higher degree of competence to work with Aboriginal clients and their families. This will  
14  
15 occur as they develop a better understanding of the cultural determinants—and worldview—  
16  
17 that shapes Aboriginal peoples' health and wellbeing and their access to appropriate and  
18  
19 timely treatment.  
20  
21  
22

23  
24 The gains made through the research will ensure that mental health services respond  
25  
26 appropriately to the needs of Aboriginal young people living with mental health difficulties.  
27  
28 Local Elders at each regional and metropolitan *headspace* site will ensure the cultural  
29  
30 protection and direction required and allow for Aboriginal-informed and co-designed  
31  
32 interventions, which are key to research translation. This study will enable the adaptation of  
33  
34 the Steady Walking Talking co-design framework to different cultural groups across Western  
35  
36 Australia and Australia, supported by local Aboriginal Elders who provide the necessary  
37  
38 cultural authority, leadership and legitimacy required for the effective implementation of the  
39  
40 framework. In addition, the co-design of culturally secure evaluation tools for youth mental  
41  
42 health services directly addresses the current gap in research on measuring interventions. This  
43  
44 unique approach will elevate Aboriginal research methods to ensure effective and culturally  
45  
46 secure youth mental health services are available across Western Australia.  
47  
48  
49  
50  
51  
52  
53  
54  
55  
56  
57  
58  
59  
60

**Authors' Contributions:**

MW, AB, PD, RM, JC, GP, AL, and EN conceived the presented research protocol. All authors contributed to writing the final manuscript.

**Funding Statement:**

This project is supported by the Australian Government Medical Research Future Fund (MRFF) as part of the Million Minds Mental Health Research Mission (MRF1178972). AL is funded by a National Health and Medical Research Council (NHMRC) Career Development Fellowship (#1148793).

**Competing Interests Statement:**

The authors declare no competing interests.

**Acknowledgements:**

We acknowledge the Nyoongar and Yawuru peoples as the original custodians of the lands on which we have been working. We also wish to acknowledge those Aboriginal communities who give their consent for us to work on their country as the research progresses. Our heartfelt appreciation also goes to the Aboriginal Elders, young people and youth mental health service staff involved as co-researchers.

## REFERENCES

1. Moss M, Lee A. TeaH (Turn 'em around Healing): a therapeutic model for working with traumatised children from Aboriginal communities. *Children Australia*2019.44(2):55-59 doi: <https://doi.org/10.1017/cha.2019.8>
2. Salmon M, et al. Intergenerational and early life influences on the well-being of Australian Aboriginal and Torres Strait Islander children: overview and selected findings from footprints in time, the longitudinal study of Indigenous children. *J Dev Orig Health Dis*2019.10(1):17-23 doi: <https://doi.org/10.1017/S204017441800017X>
3. Fitzpatrick EFM, et al. The picture talk project: Starting a conversation with community leaders on research with remote Aboriginal communities of Australia. *BMC Med Ethics*2017.18(1) doi: <https://doi.org/10.1186/s12910-017-0191-z>
4. O'Donnell M, et al. Infant removals: the need to address the over-representation of Aboriginal infants and community concerns of another 'stolen generation'. *Child Abuse Negl*2019.90:88-98 doi: <https://doi.org/10.1016/j.chiabu.2019.01.017>
5. Commonwealth of Australia. National strategic framework for Aboriginal and Torres Strait Islander peoples' mental health and social and emotional wellbeing 2017–2023. Canberra: Department of the Prime Minister and Cabinet; 2017. Available from: [https://www.niaa.gov.au/sites/default/files/publications/mhsewb-framework\\_0.pdf](https://www.niaa.gov.au/sites/default/files/publications/mhsewb-framework_0.pdf)
6. Suicide in Indigenous youth: an unmitigated crisis. *Lancet Child Adolesc Health*2019.3(3):129 doi: [https://doi.org/10.1016/S2352-4642\(19\)30034-3](https://doi.org/10.1016/S2352-4642(19)30034-3)
7. Hunter E. 'Best intentions' lives on: untoward health outcomes of some contemporary initiatives in Indigenous affairs. *Aust N Z J Psychiatry*2002.36(5):575-584 doi: <https://doi.org/10.1046%2Fj.1440-1614.2001.01040.x>
8. Wright M, et al. "If you don't speak from the heart, the young mob aren't going to listen at all": an invitation for youth mental health services to engage in new ways of

- working. *Early Interv Psychiatry* 2019.13(6):1506-1512 doi:  
<https://doi.org/10.1111/eip.12844>
9. Dudgeon P, Milroy H, Walker R, eds. Working together: Aboriginal and Torres Strait Islander mental health and wellbeing principles and practice. 2nd ed. Canberra: Commonwealth of Australia; 2014.
  10. Wright M, Lin A, O'Connell M. Humility, inquisitiveness, and openness: key attributes for meaningful engagement with Nyoongar people. *Advances in Mental Health* 2016.14(2):82-95 doi: <https://doi.org/10.1080/18387357.2016.1173516>
  11. Rix EF, et al., Service providers' perspectives, attitudes and beliefs on health services delivery for Aboriginal people receiving haemodialysis in rural Australia: a qualitative study. *BMJ Open* 2013.3(10):1-10 doi:  
<https://dx.doi.org/10.1136%2Fbmjopen-2013-003581>
  12. Coffin J. Rising to the challenge in Aboriginal health by creating cultural security. *Aborig Isl Health Work J* 2007.31(3):22-24.
  13. Commonwealth of Australia. National Aboriginal and Torres Strait Islander health plan 2013-2023. Canberra; 2013. Available from:  
[https://www1.health.gov.au/internet/main/publishing.nsf/content/B92E980680486C3BCA257BF0001BAF01/\\$File/health-plan.pdf](https://www1.health.gov.au/internet/main/publishing.nsf/content/B92E980680486C3BCA257BF0001BAF01/$File/health-plan.pdf)
  14. Stephen GH, et al. Characteristics of Indigenous primary health care service delivery models: a systematic scoping review. *Global Health* 2018.14(1):1-11 doi:  
<https://doi.org/10.1186/s12992-018-0332-2>
  15. Downing R, Kowal E, Paradies Y. Indigenous cultural training for health workers in Australia. *Int J Qual Health Care* 2011.23(3):247-257 doi: 10.1093/intqhc/mzr008
  16. Council of Australian Governments. National Indigenous reform agreement (closing the gap). 2008. Available from:



- [https://view.officeapps.live.com/op/view.aspx?src=http%3A%2F%2Fwww.federalfinancialrelations.gov.au%2Fcontent%2Fnpa%2Fhealth%2F\\_archive%2Findigenous-reform%2Fnational-agreement\\_sept\\_12.docx](https://view.officeapps.live.com/op/view.aspx?src=http%3A%2F%2Fwww.federalfinancialrelations.gov.au%2Fcontent%2Fnpa%2Fhealth%2F_archive%2Findigenous-reform%2Fnational-agreement_sept_12.docx)
17. Australian Government. National Indigenous agency marks a new era of co-design and partnership. 2019, Jul 1. Available from:  
<https://ministers.pmc.gov.au/wyatt/2019/national-indigenous-agency-marks-new-era-co-design-and-partnership>
  18. Singer J, Bennett-Levy J, Rotumah D. “You didn’t just consult community, you involved us”: transformation of a ‘top-down’ Aboriginal mental health project into a ‘bottom-up’ community-driven process. *Australas Psychiatry* 2015;23(6):614-619 doi:  
<https://doi.org/10.1177%2F1039856215614985>
  19. Sherwood J, Edwards T. Decolonisation: a critical step for improving Aboriginal health. *Contemp Nurse* 2006;22(2):178-190 doi:  
<https://doi.org/10.5172/conu.2006.22.2.178>
  20. Wright M, et al. Looking forward Aboriginal mental health project final report 2011-2015. Perth, Western Australia: Telethon Kids Institute; 2015.
  21. Wright M, et al. Building bridges community report 2018. Perth, Western Australia: Curtin University; 2018.
  22. Tuhiwai-Smith L. Decolonizing methodologies: research for Indigenous peoples. 2nd ed. London: Zed Books; 2012.
  23. Styres SD. Land as first teacher: a philosophical journeying. *Reflective Practice* 2011;12(6):717-731 doi: <https://doi.org/10.1080/14623943.2011.601083>
  24. Chino M, Debruyne L. Building true capacity: Indigenous models for Indigenous communities. *Am J Public Health* 2006. 96(4):596-599 doi:  
<https://dx.doi.org/10.2105%2FAJPH.2004.053801>

- 1  
2  
3 25. Wright M. Research as intervention: engaging silenced voices. *Action Learning*  
4  
5 *Action Research Journal*2011.17(2):25-46.  
6  
7  
8 26. Minkler M, Wallerstein N, eds. Community-based participatory research for health:  
9  
10 from process to outcomes. 2nd ed. San Francisco: Jossey-Bass; 2010.  
11  
12 27. Bessarab D, Ng'andu B. Yarning about yarning as a legitimate method in Indigenous  
13  
14 research. *Int J Crit Indig*2010.3(1):37-50 doi: <http://dx.doi.org/10.5204/ijcis.v3i1.57>  
15  
16  
17 28. Braun V, Clarke V. Using thematic analysis in psychology. *Qual Res*  
18  
19 *Psychol*2006.3(2):77-101 doi: <https://doi.org/10.1191/1478088706qp063oa>  
20  
21  
22 29. Graneheim U., Lindgren BM, and Lundman B. Methodological challenges in  
23  
24 qualitative content analysis: a discussion paper. *Nurse Educ Today*2017.56:29 doi:  
25  
26 <https://doi.org/10.1016/j.nedt.2017.06.002>  
27  
28  
29 30. National Health and Medical Research Council. Ethical conduct in research with  
30  
31 Aboriginal and Torres Strait Islander peoples and communities: guidelines for  
32  
33 researchers and stakeholders. Canberra: Commonwealth of Australia; 2018. Available  
34  
35 from: [https://www.nhmrc.gov.au/about-us/resources/ethical-conduct-research-](https://www.nhmrc.gov.au/about-us/resources/ethical-conduct-research-aboriginal-and-torres-strait-islander-peoples-and-communities)  
36  
37 [aboriginal-and-torres-strait-islander-peoples-and-communities](https://www.nhmrc.gov.au/about-us/resources/ethical-conduct-research-aboriginal-and-torres-strait-islander-peoples-and-communities)  
38  
39  
40 31. National Health and Medical Research Council. Keeping research on track II: a  
41  
42 companion document to ethical conduct in research with Aboriginal and Torres Strait  
43  
44 Islander peoples and communities: guidelines for researchers and stakeholders.  
45  
46 Canberra: Commonwealth of Australia; 2018. Available from:  
47  
48 <https://www.nhmrc.gov.au/about-us/resources/keeping-research-track-ii>  
49  
50  
51  
52  
53  
54  
55  
56  
57  
58  
59  
60

1  
2  
3  
4  
5  
6  
7  
8  
9  
10  
11  
12  
13  
14  
15  
16  
17  
18  
19  
20  
21  
22  
23  
24  
25  
26  
27  
28  
29  
30  
31  
32  
33  
34  
35  
36  
37  
38  
39  
40  
41  
42  
43  
44  
45  
46  
47  
48  
49  
50  
51  
52  
53  
54  
55  
56  
57  
58  
59  
60

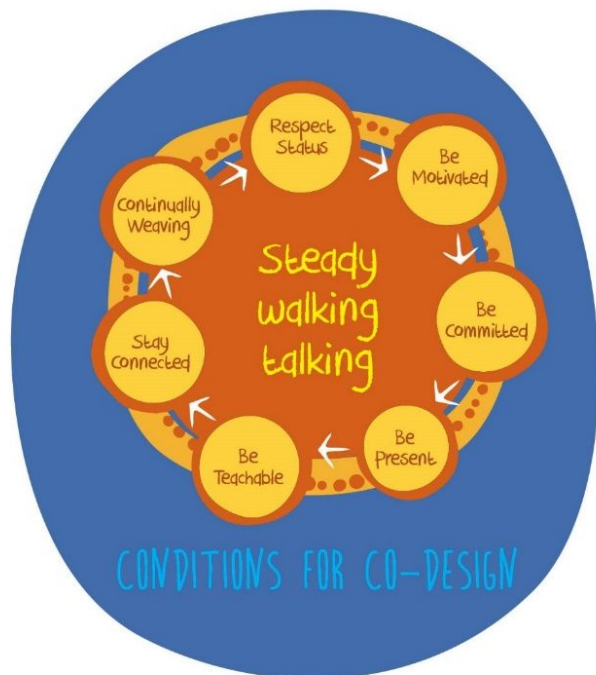

**Figure 1:** Steady Walking Talking Co-Design Framework

review only

# BMJ Open

## Our Journey, Our Story: A study protocol for the evaluation of a co-design framework to improve services for Aboriginal youth mental health and well being

|                                 |                                                                                                                                                                                                                                                                                                                                                                                                                                                                                                                                                                                                                                                                                                                                                                                                                                                   |
|---------------------------------|---------------------------------------------------------------------------------------------------------------------------------------------------------------------------------------------------------------------------------------------------------------------------------------------------------------------------------------------------------------------------------------------------------------------------------------------------------------------------------------------------------------------------------------------------------------------------------------------------------------------------------------------------------------------------------------------------------------------------------------------------------------------------------------------------------------------------------------------------|
| Journal:                        | <i>BMJ Open</i>                                                                                                                                                                                                                                                                                                                                                                                                                                                                                                                                                                                                                                                                                                                                                                                                                                   |
| Manuscript ID                   | bmjopen-2020-042981.R1                                                                                                                                                                                                                                                                                                                                                                                                                                                                                                                                                                                                                                                                                                                                                                                                                            |
| Article Type:                   | Protocol                                                                                                                                                                                                                                                                                                                                                                                                                                                                                                                                                                                                                                                                                                                                                                                                                                          |
| Date Submitted by the Author:   | 10-Mar-2021                                                                                                                                                                                                                                                                                                                                                                                                                                                                                                                                                                                                                                                                                                                                                                                                                                       |
| Complete List of Authors:       | Wright, Michael; Curtin University, School of Allied Health<br>Brown, Alex; SAHMRI, Indigenous Health<br>Dudgeon, Patricia; The University of Western Australia, School of Indigenous Studies<br>McPhee, Rob; Kimberley Aboriginal Medical Service , Chief Operating Officer<br>Coffin, Juli; Telethon Kids Institute<br>Pearson, Glenn; Telethon Kids Institute, Aboriginal Health Institute Leadership Team<br>Lin, Ashleigh; Telethon Institute for Child Health Research<br>Newnham, Elizabeth; Curtin University, School of Psychology<br>King Baguley, Kiarnee; headspace Broome<br>Webb, Michelle ; Curtin University, School of Allied Health<br>Sibosado, Amanda; Curtin University, School of Allied Health<br>Crisp, Nikayla; Curtin University, School of Allied Health<br>Flavell, Helen; Curtin University, School of Allied Health |
| <b>Primary Subject Heading</b>: | Health services research                                                                                                                                                                                                                                                                                                                                                                                                                                                                                                                                                                                                                                                                                                                                                                                                                          |
| Secondary Subject Heading:      | Health policy                                                                                                                                                                                                                                                                                                                                                                                                                                                                                                                                                                                                                                                                                                                                                                                                                                     |
| Keywords:                       | Change management < HEALTH SERVICES ADMINISTRATION & MANAGEMENT, Health & safety < HEALTH SERVICES ADMINISTRATION & MANAGEMENT, Quality in health care < HEALTH SERVICES ADMINISTRATION & MANAGEMENT                                                                                                                                                                                                                                                                                                                                                                                                                                                                                                                                                                                                                                              |
|                                 |                                                                                                                                                                                                                                                                                                                                                                                                                                                                                                                                                                                                                                                                                                                                                                                                                                                   |

SCHOLARONE™  
Manuscripts

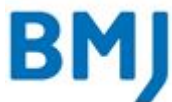

I, the Submitting Author has the right to grant and does grant on behalf of all authors of the Work (as defined in the below author licence), an exclusive licence and/or a non-exclusive licence for contributions from authors who are: i) UK Crown employees; ii) where BMJ has agreed a CC-BY licence shall apply, and/or iii) in accordance with the terms applicable for US Federal Government officers or employees acting as part of their official duties; on a worldwide, perpetual, irrevocable, royalty-free basis to BMJ Publishing Group Ltd ("BMJ") its licensees and where the relevant Journal is co-owned by BMJ to the co-owners of the Journal, to publish the Work in this journal and any other BMJ products and to exploit all rights, as set out in our [licence](#).

The Submitting Author accepts and understands that any supply made under these terms is made by BMJ to the Submitting Author unless you are acting as an employee on behalf of your employer or a postgraduate student of an affiliated institution which is paying any applicable article publishing charge ("APC") for Open Access articles. Where the Submitting Author wishes to make the Work available on an Open Access basis (and intends to pay the relevant APC), the terms of reuse of such Open Access shall be governed by a Creative Commons licence – details of these licences and which [Creative Commons](#) licence will apply to this Work are set out in our licence referred to above.

Other than as permitted in any relevant BMJ Author's Self Archiving Policies, I confirm this Work has not been accepted for publication elsewhere, is not being considered for publication elsewhere and does not duplicate material already published. I confirm all authors consent to publication of this Work and authorise the granting of this licence.

1  
2  
3  
4  
5 **Our Journey, Our Story: A study protocol for the evaluation of a co-design framework**  
6 **to improve services for Aboriginal youth mental health and wellbeing**  
7  
8  
9  
10  
11

12 Corresponding author: **Associate Professor Michael Wright**  
13  
14 School of Occupational Therapy, Social Work and Speech  
15  
16 Pathology, Curtin University, GPO Box U1987, Perth Western  
17  
18 Australia, Australia 6845  
19  
20 Email: [m.wright@curtin.edu.au](mailto:m.wright@curtin.edu.au)  
21  
22  
23  
24 Tel: 61 8 9266 1637 (no Fax number available)  
25

26 Co-authors **Professor Alex Brown**  
27  
28 South Australian Health and Medical Research Institute,  
29  
30 Adelaide, South Australia, Australia  
31  
32  
33 **Professor Patricia Dudgeon**  
34  
35 The University of Western Australia  
36  
37 Perth, Western Australia, Australia  
38  
39  
40 **Mr Rob McPhee**  
41  
42 Kimberley Aboriginal Medical Services  
43  
44 Broome, Western Australia, Australia  
45  
46  
47 **Professor Juli Coffin**  
48  
49 Telethon Kids Institute  
50  
51 Broome, Western Australia, Australia  
52  
53  
54 **Mr Glenn Pearson**  
55  
56 Telethon Kids Institute  
57  
58 Nedlands, Perth, Western Australia, Australia  
59  
60

**Associate Professor Ashleigh Lin**

Telethon Kids Institute

Nedlands, Perth, Western Australia, Australia

**Dr Elizabeth Newnham**

Curtin University, Perth, Western Australia, Australia

**Ms Kiarnee King Baguley**

headspace Broome

Broome, Western Australia, Australia

**Ms Michelle Webb**

Curtin University

Perth, Western Australia, Australia

**Ms Amanda Sibosado**

Curtin University

Perth, Western Australia, Australia

**Ms Nikayla Crisp**

Curtin University

Perth, Western Australia, Australia

**Dr Helen Flavell**

Curtin University

Perth, Western Australia, Australia

Source of support:

Australian Government Medical Research Future Fund (MRFF)  
as part of the Million Minds Mental Health Research Mission  
(MRF1178972).

Keywords:

health services, change management, health and safety, quality  
in health care, first nations

1  
2  
3 Word count: 4417 excluding title page, references and figure  
4  
5  
6  
7

8 Number of figures and tables: 3  
9  
10  
11  
12  
13  
14  
15  
16  
17  
18  
19  
20  
21  
22  
23  
24  
25  
26  
27  
28  
29  
30  
31  
32  
33  
34  
35  
36  
37  
38  
39  
40  
41  
42  
43  
44  
45  
46  
47  
48  
49  
50  
51  
52  
53  
54  
55  
56  
57  
58  
59  
60

For peer review only



## ABSTRACT

**Introduction:** Mainstream Australian mental health services are failing Aboriginal young people. Despite investing resources, improvements in wellbeing have not materialised. Culturally and age appropriate ways of working are needed to improve service access and responsiveness. This Aboriginal-led study brings Aboriginal Elders, young people and youth mental health service staff together to build relationships to co-design service models and evaluation tools. Currently, three Western Australian youth mental health services in the Perth metropolitan area and two regional services are working with local Elders and young people to improve their capacity for culturally and age appropriate services. Further Western Australian sites will be engaged as part of research translation.

**Methods and analysis:** Relationships ground the study, which utilises Indigenous methodologies and participatory action research. This involves Elders, young people and service staff as co-researchers and the application of a decolonising, strengths-based framework to create the conditions for engagement. It foregrounds experiential learning and Aboriginal ways of working to establish relationships and deepen non-Aboriginal co-researchers' knowledge and understanding of local, place-based cultural practices. Once relationships are developed, co-design workshops occur at each site directed by local Elders and young people. Co-designed evaluation tools will assess any changes to community perceptions of youth mental health services and the enablers and barriers to service engagement.

**Ethics and dissemination:** The study has approval from the Kimberley Aboriginal Health Planning Forum Kimberley Research Subcommittee and the Western Australian Aboriginal Health Ethics Committee, and the Curtin University Human Research Ethics Committee. Transferability of the outcomes across the youth mental health sector will be directed by the co-researchers and is supported through Aboriginal and non-Aboriginal organisations

1  
2  
3 including youth mental health services, peak mental health bodies and consumer groups.  
4  
5 Community reports and events, peer-reviewed journal articles, conference presentations, and  
6  
7 social and mainstream media will aid dissemination.  
8  
9  
10  
11  
12

13 **Keywords:** Aboriginal mental health, access to health care, youth, community participation,  
14  
15 relationships  
16  
17

18  
19  
20 **Strengths and limitations of this study:**  
21

- 22
- 23 • The project approach draws on the strength, wisdom and knowledge of Aboriginal  
24 Elders and young people within local areas.  
25
  - 26 • Indigenous methodologies and participatory action research enhances respect for local  
27 Aboriginal traditions, customs and cultural worldviews at each site including varying  
28 experiences of colonisation.  
29
  - 30 • Co-designing with youth mental health services has the potential for comparability  
31 and national generalisability, however, there is also potential tension between  
32 standardised models of care and ensuring that local community needs and cultural  
33 practices guide model development.  
34
  - 35 • Partnerships with peak bodies and service providers facilitates rapid policy change.  
36
  - 37 • The project benefits from Aboriginal leadership to facilitate two-way knowledge  
38 exchange.  
39  
40  
41  
42  
43  
44  
45  
46  
47  
48  
49  
50  
51  
52  
53  
54  
55  
56  
57  
58  
59  
60

## INTRODUCTION

Colonial policies resulting in the systematic loss of land, language, culture, family connection and spiritual identity have had cumulative and intergenerational effects for Aboriginal<sup>1</sup> peoples in Australia.[1, 2, 3] Young people can be particularly vulnerable to the ongoing impact of colonisation, evidenced by the continued removal of children from their families into the care of non-Aboriginal people.[4], Aboriginal young people in Australia face heightened risk for poor mental health [5], with Aboriginal children and adolescents aged 5-17 years dying from suicide at five times the rate of non-Aboriginal young people.[6] Mental health systems, policies and practices continue to reinforce colonial ideologies in service provision.[7] A lack of leadership and truth telling about the shared history of Australia has resulted in Aboriginal people having a deep mistrust of institutions including mainstream mental health services.[8] Self-determination is critical to mental health services for Aboriginal people but is lacking from policy and practice.[9] Culturally secure health service must therefore recognise Aboriginal cultural practices and worldviews, and work toward establishing relationships that engender a sense of trust between services, staff, and Aboriginal people, their families and communities.[10, 11]

Building the cultural capability of non-Aboriginal health professionals to increase the accessibility, responsiveness, and cultural security [12] of mainstream services is essential to improve outcomes for Aboriginal people.[13] However, terminology surrounding the cultural capability of non-Aboriginal health professionals is contestable as there is a tendency to rely on cultural awareness training. Although an important step, the impact of awareness training

---

<sup>1</sup> The term 'Aboriginal' has been used in this article to refer to both the Aboriginal and Torres Strait Islander peoples of Australia. Our intention in using 'Aboriginal' is to acknowledge the significance of place and that this project will be conducted on Aboriginal country in Western Australia with different clan groups. The authors acknowledge that Aboriginal and Torres Strait Islander peoples may identify with their local clan or group name and mean no disrespect in using the term Aboriginal.

1  
2  
3 is limited as it does little to change organisational culture or practice .[14] It is widely  
4  
5 acknowledged that cultural capability development is a continuum that occurs over time  
6  
7 through ongoing contact to foster and build meaningful relationships that lead to greater  
8  
9 understanding and respect for culture. [10, 14]  
10  
11

12  
13 Government policy emphasises co-designed responses to health inequities characterised by  
14  
15 equal partnerships (see for example, [15, 16]). However, what is lacking are directions on  
16  
17 how to engage in culturally secure co-design processes that address colonialism, power  
18  
19 inequalities, racism, white privilege and unconscious bias.[10, 17] Meaningfully engaging in  
20  
21 a decolonising process requires co-design with Aboriginal people to reframe current  
22  
23 responses to health inequities and to improve the accessibility and responsiveness of  
24  
25 mainstream youth mental health services.[10, 18]  
26  
27

28  
29 This research addresses the lack of cultural security (which affects the accessibility and  
30  
31 responsiveness of youth mental health services) and culturally appropriate evaluation tools to  
32  
33 determine the effectiveness of services in meeting the needs of Aboriginal young people. The  
34  
35 intended outputs and outcomes will occur through a culturally grounded, relationship-based  
36  
37 process that will create and sustain partnerships with Aboriginal Elders, young people and  
38  
39 youth mental health service staff. Participants will work together to co-design appropriate  
40  
41 service models, system change interventions and evaluation tools to measure organisational  
42  
43 change. Unique to this project is the drawing together of cultural protocols and research to  
44  
45 develop innovative, decolonised service provision to improve the social and emotional  
46  
47 wellbeing of Aboriginal youth.  
48  
49  
50  
51

### 52 53 **Steady Walking Talking co-design framework**

54  
55 The Steady Walking Talking co-design framework (Figure 1) acknowledges and privileges  
56  
57 Aboriginal ways of being, knowing and doing and underpins the participatory action research  
58  
59 and co-design study methods. [19] It, therefore, constitutes the methodological approach and  
60

1  
2  
3 informs the research methods that embody an Aboriginal worldview through the application  
4  
5 of seven culturally informed conditions for the development of relationships. The seven  
6  
7 conditions outlined in the co-design framework (see Figure 1) are supported through  
8  
9 immersive experiential learning sessions led and held by Elders as the cultural knowledge  
10  
11 holders (described in more detail under Methods). The framework models the interconnected  
12  
13 relationship between Aboriginal protocols, values, beliefs and research practices within  
14  
15 Indigenous methodologies. [20] The framework is decolonising and strengths-based and has  
16  
17 proven to build the capability and confidence of non-Aboriginal people to change health  
18  
19 service organisational culture. It was developed, tested and validated over seven years of  
20  
21 participatory action research with Nyoongar Elders in metropolitan Perth.[19]  
22  
23

24  
25  
26 {Insert Figure 1 }  
27  
28

29  
30 The framework was co-designed as one of three foundational components of a larger  
31  
32 decolonising systemic change framework [19], and subsequently applied to improve the  
33  
34 delivery of Aboriginal youth mental health services.[21] Findings from prior research have  
35  
36 shown that this type of engagement will build relationship, trust and mutual  
37  
38 understanding.[21] The process for building relationships takes time and is circular rather  
39  
40 than didactic and linear. Importantly, for non-Aboriginal service staff need to commit to  
41  
42 being fully present and open to learning with humility.[22]  
43  
44

## 45 46 **METHODS AND ANALYSIS** 47

### 48 49 **Study Aims** 50

51  
52 This research aims to enhance the capacity of mainstream youth mental health service  
53  
54 providers to be flexible, confident and competent when responding to the needs of Aboriginal  
55  
56 young people. Specifically, the project will provide an evidence base that describes optimal  
57  
58 youth mental health service accessibility and responsiveness to improve the social, emotional  
59  
60

1  
2  
3 and mental wellbeing of Aboriginal young people. To achieve this, the Steady Walking and  
4 Talking framework will be implemented across metropolitan Perth and regional Western  
5  
6 Australia locations with different language and clan groups (the specific groups and settings  
7  
8 are described in more detail under 'Patient and public involvement' and 'Participants and  
9  
10 setting').  
11  
12  
13  
14

15 The research harnesses the cultural leadership of Aboriginal Elders and young people to alter  
16  
17 the way services work with and for Aboriginal youth, their families and communities by:  
18  
19

- 20 1. Applying the co-design framework at each site in Western Australia so that local  
21  
22 Elders, young people and youth mental health service staff can build and sustain  
23  
24 relationships.  
25  
26
- 27 2. Co-designing governance structures, culturally secure clinical practices, community  
28  
29 engagement and workforce strategies with local Aboriginal Elders, young people and  
30  
31 service staff.  
32  
33
- 34 3. Evaluating the impact of the changes to systems and work practices on community  
35  
36 perceptions, and the accessibility and responsiveness of youth mental health services  
37  
38 and their effectiveness in meeting the needs of Aboriginal young people from  
39  
40 different cultural groups.  
41  
42
- 43 4. Ensuring the cultural and age appropriate services and systems changes have  
44  
45 occurred. The evaluation measures will also be locally co-designed with Elders and  
46  
47 young people.  
48  
49

50 Accordingly, the research aims to answer the following questions:  
51  
52

- 53 1. How do the seven conditions stated in the Steady Walking and Talking Framework  
54  
55 establish relationships and trust between services and the Aboriginal community so  
56  
57 they can work together in different regions?  
58  
59  
60

- 2.
3. How do the key attributes of a culturally secure health service meet the needs of young Aboriginal people who differ across Aboriginal cultural groups?
4. How do the key criteria of a culturally secure youth mental health service evaluation differ across Aboriginal cultural groups?
5. Has the framework resulted in more young Aboriginal people accessing these mental health services and with greater levels of satisfaction with the partner services?

### Study Design

Participatory action research grounded in Indigenous research methodologies [23-25] allows services and clinical models to evolve during the project. Aboriginal research and evaluation must respect Aboriginal worldviews, and be responsive to the self-determined intentions, priorities and drivers expressed by Aboriginal people.[25] As Tuhiwai Smith has argued, Indigenous research methodologies involve “talking up to” Western research practices that are “embedded in a global system of imperialism and power.” [20 p. xi] In this study, therefore, the application of Indigenous research methodologies involves legitimising holistic Indigenous knowledge systems, reciprocity and relationship between researcher and participants as a natural part of research, collectivity and obligation as a way of knowing, and valorising Indigenous methods such as storytelling. [26] Participatory action research has been adopted as it aligns with collective consultative cultural practices and emphasises mutual respect and co-learning; individual and community building; systems change; and a balance between research and action. [25, 27] Through participatory action research, Elders, young people and service staff engage as co-researchers, which is characterised by cyclical, narrative, dynamic and reflective processes. Additionally, the iterative nature of the research design and implementation promotes success. [27] Figure 2 provides a timeline for the project activities.

{Insert Figure 2}

## **Patient and public involvement OR meaningful community involvement**

To decolonise youth mainstream mental health services and strengthen the wellbeing of Aboriginal young people, decolonising processes are essential to challenge the taken-for-granted assumptions, practices, hierarchies and language of Western knowledge systems including those evident in youth mental health services. [28] To that end—and to honour Aboriginal collective consultation and decision-making processes—‘patient and public involvement’ in this project is better understood as ‘meaningful community involvement’ which encompasses Elders, young people (and through their connection to the broader community) others with lived experience of youth mental health services. ‘Meaningful community involvement’ is designed to ‘push back’ on transactional Western ways of being, doing and knowing by emphasising Aboriginal collective ways of working characterised by obligation and reciprocity.

‘Community’ has thus led and directed the formative research and leads and directs this project. First, the Steady Walking Talking framework, which holds and informs the research process, was co-designed by Nyoongar Elders. Second, Nyoongar Elders instructed the Our Journey, Our Story project’s focus on mainstream youth mental health services by highlighting the need for youth mental health services to improve their accessibility and responsiveness. [21] Third, Aboriginal researchers are accountable to their communities, and are bound by cultural protocols and a constant feedback loop that ensures accountability. Fourth, participatory action research and co-design methods amplify and legitimise community voices and provide community members opportunities to further develop capacity to lead change for the benefit of their communities. [25]

The research team believes the community-led process of relationship building creates conditions that empower communities to influence strategic action for impact. [8] Trusting



1  
2  
3 and meaningful relationships are crucial as they enable non-Aboriginal service staff co-  
4  
5 researchers to deepen their understanding of culture and spirit to inform changes to service  
6  
7 delivery. The research questions for the project therefore reflect an Aboriginal worldview and  
8  
9 are primarily concerned with *processes* that support relationship building. In the absence of  
10  
11 trust, relationships that are formed, developed and maintained create positive local, place-  
12  
13 based change that meets the collective priorities and needs of the communities involved.  
14  
15

16  
17 The research team acknowledges the Nyoongar and Yawuru peoples as the custodians of the  
18  
19 lands on which they are working. They wish to acknowledge those Aboriginal communities  
20  
21 who guide and support the research and give consent to work on their country. Our heartfelt  
22  
23 appreciation go to the Aboriginal Elders, young people and youth mental health service staff  
24  
25 involved as co-researchers.  
26  
27

### 28 29 **Setting and Participants**

30  
31  
32 The five-year project runs from June 2019 to May 2024 and will be undertaken across  
33  
34 metropolitan Perth and regional Western Australia in partnership with local *headspace*  
35  
36 centres (henceforth referred to as sites). *headspace* is a federal government-funded youth  
37  
38 mental health service that operates nationally with more than 110 centres offering tailored  
39  
40 psychological intervention. The Steady Walking Talking framework is currently being  
41  
42 applied across three Perth metropolitan sites on Nyoongar Wadjuk country, one satellite site  
43  
44 in rural Northam on Nyoongar Yuat/Balladong country, and one on Yawuru country in  
45  
46 Broome in the Kimberley region of Western Australia (see Figure 3). Other Western  
47  
48 Australian sites are planned as part of the research translation and their involvement will be  
49  
50 determined by each community.  
51  
52

53  
54  
55 {Insert Figure 3}

56  
57  
58 Three groups of participants are being recruited for each site:  
59  
60

1  
2  
3  
4  
5  
6  
7  
8  
9  
10  
11  
12  
13  
14  
15  
16  
17  
18  
19  
20  
21  
22  
23  
24  
25  
26  
27  
28  
29  
30  
31  
32  
33  
34  
35  
36  
37  
38  
39  
40  
41  
42  
43  
44  
45  
46  
47  
48  
49  
50  
51  
52  
53  
54  
55  
56  
57  
58  
59  
60

1. *Elders, young people and headspace staff.* These participants will be co-researchers and involved in co-design workshops. Approximately 3-5 local Elders<sup>2</sup> (traditional owners where each of the sites are located) and 3-5 young people (ages 18-25) will be invited to participate. Exclusion criteria include anyone under 18 years and individuals acutely unwell with mental health difficulties, or persons with dependent relationships (such as those currently receiving treatment from the sites). It is vital that *headspace* co-researchers come from all levels of the organisation, including executives, clinical, allied and administrative staff (approximately 3-5 from each partner service site). Although confidentiality will be maintained, co-researchers, due to their high-profile role in the co-design process, will be identifiable to other co-researchers and community members. Comprehensive culturally relevant information sheets in plain language are provided to ensure informed consent for all aspects of involvement in the research.

2. *Clients at headspaces centres.* Quantitative data will be collected from each of the sites. These data will be routinely collected and de-identified to maintain confidentiality. For example, data will include the number of Aboriginal young people triaged by each service; the number accepted by the service or referred elsewhere; and the median length of engagement with the service. Of note, due to the participatory action research methodology, the co-design process may point to other measures of service evaluation for which an ethics amendment will be sought.

3. *Local Aboriginal community members.* Community perceptions of *headspace* centres will be collected from an additional group of Aboriginal community members who provide informed consent. Approximately twenty people per site will be invited to participate in in-depth community interviews which will be audio recorded and transcribed.

---

<sup>2</sup> Please note, male and female representation for all participant groups will reflect local cultural protocols/context and will be determined through consultation with local communities through the co-researchers.

## Methods & Planned Analyses

Research activities conducted at each site will adopt participatory action research principles to ensure the research is community-led. Recruitment and engagement at each site will be informed by local cultural practices, context, needs and draw on existing relationships between investigators, the research team and community members. Of note, seven of the ten investigators are respected Aboriginal researchers with cultural connections across Western Australia and the project research team is also predominately Aboriginal. The project works to the rhythms of each community; this means a ‘steady, steady’ approach which respects and accepts the likely unavailability of the Aboriginal co-researchers due to cultural obligations. All Aboriginal community co-researchers receive proper compensation for their time in respect of their lived experience and expertise.

### *Engagement*

In addition to the research team’s networks, co-researchers may be recruited through local forums. Relevant staff from each participating site will be recruited internally and each site’s youth reference group will also be engaged with to ensure ongoing youth participation. The relevance of the Steady Walking Talking framework to different cultural groups or clans will be determined through each local communities’ engagement in the research. For example, Yawuru Elders and young people currently working with the research team at the Broome site have responded very positively to the research team’s way of working—and the Steady Walking Talking framework—as indicated by their regular attendance at project video conferences and engagement in research activities. Despite the framework being co-designed with Nyoongar Elders, the acceptance and positivity shown by Yawuru people suggests the seven steps to support relationship building in the framework is relevant to other clan groups.

### *Preparation for Working Together and Co-design Workshops*

1  
2  
3 A series of workshops will be hosted in each site. As part of the preparation for co-design,  
4  
5 Elders, young people and service staff will meet regularly for cultural teaching and mentoring  
6  
7 including Storying and On Country experiential learning. As the name suggests, Storying  
8  
9 provides a safe non-judgemental space for Aboriginal and non-Aboriginal people to share  
10  
11 their stories and histories and is a conduit for appreciating the impact of colonisation on  
12  
13 health, wellbeing and identity.[20] Findings have shown that Storying can deepen and sustain  
14  
15 relationships over the course of a project.[8] Storying provides the foundation for the On  
16  
17 Country experience with Elders and provides the next steps for deepening relationships. This  
18  
19 occurs through the experience of hearing and being shown how culture is experienced  
20  
21 through the stories of being On Country.[8, 21] After establishing a strong foundation for  
22  
23 working together, participants are ready for the co-design which will focus on changing work  
24  
25 practices to increase Aboriginal youth engagement in mental health services and inform the  
26  
27 development of outcome indicators. Comparison of co-designed service change priorities and  
28  
29 evaluation indicators at each site with different clan groups will address Research Aims 2 and  
30  
31 3.  
32  
33  
34  
35  
36  
37  
38  
39

40 The co-design workshops will change and assess work practices to improve service access  
41  
42 and responsiveness for young people. Workshop discussions will be audio-recorded and  
43  
44 transcribed and supplemented by observation notes. The creation of a meaningful working  
45  
46 together space, where Aboriginal people, Elders and young people are heard and can share  
47  
48 their wisdom will deepen non-Aboriginal participants' understanding of Aboriginal ways of  
49  
50 working. Elders and young peoples' relationships with service staff at all levels and  
51  
52 continued engagement with the services—through an effective working together  
53  
54 relationship—will similarly indicate whether there is trust in the service (Research Aim 1).  
55  
56 Interviews, focus groups, and data gathered from co-design processes will be analysed to  
57  
58  
59  
60

1  
2  
3 determine the level of commitment of all co-design participants to the process of relationship  
4 building and subsequent service changes. Evidence of meaningful changes to service  
5 practice, governance structures, inclusion of Elders and young people in decision-making,  
6 workforce, training and recruitment processes will be an indication of trust (Research Aim 1).  
7  
8  
9  
10  
11  
12  
13

14 Staff turnover is a potential challenge to sustaining relationships. However, the period of  
15 relationship building and co-design workshops that occurs at each site over approximate two  
16 and a half years is ample time to manage staff transitioning in and out of the service.  
17  
18 Similarly, the intention is to embed increased knowledge of Aboriginal ways of working into  
19 the organisation to sustain relationships and support service change. Young co-researchers  
20 also have the potential to move on, however, the process of working together—including the  
21 role of the Elders and research team in holding the young people—creates a safe environment  
22 for young people new to the project to build relationships.  
23  
24  
25  
26  
27  
28  
29  
30  
31  
32  
33  
34  
35

36 Qualitative data analysis will employ an inductive approach, consistent with the principles of  
37 thematic content analysis.[29] Two researchers (Aboriginal and non-Aboriginal) will code  
38 the data, and cross-code 10% of the dataset to establish inter-rater reliability.[30] The initial  
39 themes will be presented to the co-researchers (Elders, young people and service staff co-  
40 researchers) for member checking before comprehensive coding and thematic analysis.  
41  
42  
43  
44  
45  
46  
47

#### 48 *Clients at headspace centre sites*

49

50 Service data will analysed to track changes to service accessibility and responsiveness.  
51

52 Demographic and service use data for Aboriginal clients will be analysed to examine:  
53

54 accessibility (i.e. how many are attending services), demographics (i.e. who is attending  
55 services), acceptability (i.e. length of time engaged), responsiveness (i.e. type of services  
56 provided), severity at intake (i.e. how unwell are youth at presentation), and satisfaction (i.e.  
57  
58  
59  
60

1  
2  
3 satisfaction with the services). Data will be analysed at baseline and annually to assess  
4  
5 whether the co-design process results in improvements to accessibility, acceptability, intake  
6  
7 severity and satisfaction. Analysis of this data along with qualitative community assessment  
8  
9 data (described below) will answer Research Aim 4.  
10  
11

### 12 13 *Community Assessment*

14  
15 In-depth yarning interviews and/or focus groups will assess the local Aboriginal community's  
16  
17 perceptions of sites, and the enablers and barriers to service engagement. Yarning is an  
18  
19 accepted culturally informed method of qualitative data collection using semi-structured  
20  
21 neutral, open-ended questions that adhere to Aboriginal protocols including the use of stories  
22  
23 to develop a relationship between interviewer and interviewee. [31] The community  
24  
25 assessment may include co-designed quantitative measures to assess service access and  
26  
27 responsiveness and narrative based case studies consistent with Aboriginal knowledge  
28  
29 systems. Qualitative data will be analysed using thematic content analysis (described above  
30  
31 for co-design workshops) to determine culturally nuanced expressions of distress, factors  
32  
33 associated with engagement, and barriers to access.  
34  
35  
36  
37  
38

## 39 **ETHICS AND DISSEMINATION**

40  
41  
42 Two documents produced by the National Health and Medical Research Council of Australia  
43  
44 underpin the design of this research: Ethical conduct in research with Aboriginal and Torres  
45  
46 Strait Islander peoples and communities: Guidelines for researchers and stakeholders [32],  
47  
48 and Keeping Research on Track II: A companion document to Ethical conduct in research  
49  
50 with Aboriginal and Torres Strait peoples and Communities: Guidelines for researchers and  
51  
52 stakeholders.[33]  
53  
54

55  
56 Approvals for the study include the Kimberley Aboriginal Health Planning Forum Kimberley  
57  
58 Research Subcommittee, the Western Australian Aboriginal Health Ethics Committee (HREC  
59  
60

1  
2  
3 955) and reciprocal approval from the Curtin University Human Research Ethics Committee  
4  
5 (HRE2020-0023). Ethical and respectful engagement with communities will be guided by the  
6  
7 Elder and youth co-researchers, and consideration has been given to the role of caregivers.  
8  
9  
10 We have developed safety protocols in the event of participant distress, which reflect the  
11  
12 context, needs and local mental health resources. The research team has undertaken training  
13  
14 in Aboriginal mental health first aid. Images and video recordings and consent for image use  
15  
16 (including cultural considerations) is sought at the initial consent process and prior to images  
17  
18 being used.  
19  
20  
21

### 22 *Dissemination*

23  
24  
25 The active involvement of Elders and young people alongside service staff in co-design will  
26  
27 ensure the rapid translation of study outcomes. Their collective involvement through all  
28  
29 research stages provides the conditions for knowledge exchange to occur across the sector.  
30  
31 Research translation in this study is twofold. First, it will be guided and held by Aboriginal  
32  
33 knowledge through the Elders and young people at each site. Second, the translation and  
34  
35 dissemination of findings will be designed by participants. This approach ensures the  
36  
37 commitment of all stakeholders to implement the findings as well as their ownership of the  
38  
39 ensuing process and outcomes.  
40  
41  
42

43  
44 Work strategically commenced at the Broome site as this is a complex setting with large  
45  
46 numbers of Aboriginal young people from the surrounding regions with high needs. Current  
47  
48 findings indicate that there are key learnings from Broome headspace, which has as its lead  
49  
50 agency the Kimberley Aboriginal Medical Service.<sup>3</sup> The replication of findings from Broome  
51  
52 will be a major focus of the research dissemination and impact activities. This includes  
53  
54  
55  
56

---

57  
58 <sup>3</sup> Each headspace is nationally funded and run by a local health service selected through a competitive tender  
59  
60 process. The Broome site is unique as it is the only headspace in Western Australia with an Aboriginal  
Controlled Community Organisation as its lead service or agency.

1  
2  
3 working with additional regional sites (provided community consent is given) to replicate  
4  
5 effective Broome service access and responsiveness models. In addition, the following  
6  
7 activities will be undertaken to ensure broad uptake of the results:  
8  
9

- 10 • Annual reports, information sheets and newsletters will be distributed to community  
11 members and the sector.  
12
- 13 • A community translation forum will be convened in each site in the final year of the  
14 study.  
15
- 16 • A co-designed media campaign with Aboriginal young people will be undertaken to  
17 extend translation impact for Aboriginal young people.  
18
- 19 • Workshops led by Elder and young co-researchers will be held for policy makers  
20 from key organisations including: national Headspace, Aboriginal Health Council of  
21 Western Australia, Western Australian Primary Health Alliance, Western Australian  
22 Country Health Services, Orygen, Commissioner for Children and Young People  
23 Western Australia, the Youth Affairs Council of Western Australia, the Aboriginal  
24 Health Council of Western Australia, the Western Australian Mental Health  
25 Commission, the Western Australian Department of Health, Department for Child  
26 Protection and Family Support, the Western Australian Police Force and Education  
27 Department.  
28
- 29 • The partnership with *headspace* National and Western Australian *headspace* centres  
30 provides the opportunity to deliver a state network of services with significantly  
31 increased ability to meet the needs of Aboriginal young people.  
32
- 33 • Peer and non-peer reviewed publications will add to the existing body of knowledge.  
34
- 35 • Seminars will be presented at local and national organizations and universities, and at  
36 representative peak organizations to highlight findings and promote their uptake.  
37  
38  
39  
40  
41  
42  
43  
44  
45  
46  
47  
48  
49  
50  
51  
52  
53  
54  
55  
56  
57  
58  
59  
60



- Presentations will also be given at relevant local, national and international conferences, and wherever possible, with Elders and young people as co-presenters.
- Closed briefings will be provided to state and national politicians and senior executives of mental health services for Aboriginal communities and young people.

### **Authors' Contributions:**

MWright, AB, PD, RM, JC, GP, AL, and EN conceived the research protocol design.

MWright, HF, and EN wrote the first draft. Critical revisions were provided by MWright, AB, PD, RM, JC, GP, AL, EN, KKB, MWebb, AS, NC and HF. All authors contributed to writing the final manuscript and agree to be accountable for all aspects of the work.

### **Funding Statement:**

This project is supported by the Australian Government Medical Research Future Fund (MRFF) as part of the Million Minds Mental Health Research Mission (MRF1178972). AL is funded by a National Health and Medical Research Council (NHMRC) Career Development Fellowship (1148793).

### **Competing Interests Statement:**

The authors declare no competing interests.

## REFERENCES

1. Moss M, Lee A. TeaH (Turn ‘em around Healing): a therapeutic model for working with traumatised children from Aboriginal communities. *Children Australia* 2019; 44(2):55-59 doi: 10.1017/cha.2019.8
2. Salmon M, et al. Intergenerational and early life influences on the well-being of Australian Aboriginal and Torres Strait Islander children: overview and selected findings from footprints in time, the longitudinal study of Indigenous children. *J Dev Orig Health Dis* 2019; 10(1):17-23 doi: 10.1017/S204017441800017X
3. Fitzpatrick E.F.M, et al. The picture talk project: Starting a conversation with community leaders on research with remote Aboriginal communities of Australia. *BMC Med Ethics* 2017; 18(1) doi: 10.1186/s12910-017-0191-z
4. O’Donnell M, et al. Infant removals: the need to address the over-representation of Aboriginal infants and community concerns of another ‘stolen generation’. *Child Abuse Negl* 2019; 90:88-98 doi: 10.1016/j.chiabu.2019.01.017
5. Commonwealth of Australia. National strategic framework for Aboriginal and Torres Strait Islander peoples' mental health and social and emotional wellbeing 2017–2023. Canberra: Department of the Prime Minister and Cabinet; 2017. Available from: [https://www.niaa.gov.au/sites/default/files/publications/mhsewb-framework\\_0.pdf](https://www.niaa.gov.au/sites/default/files/publications/mhsewb-framework_0.pdf)
6. Suicide in Indigenous youth: an unmitigated crisis. *Lancet Child Adolesc Health* 2019; 3(3):129 doi: 10.1016/S2352-4642(19)30034-3
7. Hunter E. ‘Best intentions’ lives on: untoward health outcomes of some contemporary initiatives in Indigenous affairs. *Aust N Z J Psychiatry* 2002; 36(5):575-584 doi: 10.1046%2Fj.1440-1614.2001.01040.x

- 1  
2  
3 8. Wright M, et al. "If you don't speak from the heart, the young mob aren't going to  
4 listen at all": an invitation for youth mental health services to engage in new ways of  
5 working. *Early Interv Psychiatry* 2019; 13(6):1506-1512 doi: 10.1111/eip.12844  
6  
7
- 8 9. Dudgeon P, Milroy H, Walker R, eds. Working together: Aboriginal and Torres Strait  
9 Islander mental health and wellbeing principles and practice. 2nd ed. Canberra:  
10 Commonwealth of Australia; 2014.  
11  
12 [https://www.telethonkids.org.au/globalassets/media/documents/aboriginal-](https://www.telethonkids.org.au/globalassets/media/documents/aboriginal-health/working-together-second-edition/working-together-aboriginal-and-wellbeing-2014.pdf)  
13 [health/working-together-second-edition/working-together-aboriginal-and-wellbeing-](https://www.telethonkids.org.au/globalassets/media/documents/aboriginal-health/working-together-second-edition/working-together-aboriginal-and-wellbeing-2014.pdf)  
14 [2014.pdf](https://www.telethonkids.org.au/globalassets/media/documents/aboriginal-health/working-together-second-edition/working-together-aboriginal-and-wellbeing-2014.pdf) (accessed 28 Feb 2021)  
15  
16
- 17 10. Wright M, Lin A, O'Connell M. Humility, inquisitiveness, and openness: key  
18 attributes for meaningful engagement with Nyoongar people. *Advances in Mental*  
19 *Health* 2016; 14(2):82-95 doi: 10.1080/18387357.2016.1173516  
20  
21
- 22 11. Rix EF, et al., Service providers' perspectives, attitudes and beliefs on health services  
23 delivery for Aboriginal people receiving haemodialysis in rural Australia: a  
24 qualitative study. *BMJ Open* 2013; 3(10):1-10 doi: 10.1136/bmjopen-2013-  
25 003581  
26  
27
- 28 12. Coffin J, Rising to the challenge in Aboriginal health by creating cultural security.  
29 *Aborig Isl Health Work J* 200; 31(3):22-24.  
30  
31
- 32 13. Commonwealth of Australia. National Aboriginal and Torres Strait Islander health  
33 plan 2013-2023. Canberra; 2013.  
34  
35 [https://www1.health.gov.au/internet/main/publishing.nsf/content/B92E980680486C3](https://www1.health.gov.au/internet/main/publishing.nsf/content/B92E980680486C3BCA257BF0001BAF01/$File/health-plan.pdf)  
36 [BCA257BF0001BAF01/\\$File/health-plan.pdf](https://www1.health.gov.au/internet/main/publishing.nsf/content/B92E980680486C3BCA257BF0001BAF01/$File/health-plan.pdf) (accessed 28 Feb 2021)  
37  
38
- 39 14. Downing R, Kowal E, Paradies Y. Indigenous cultural training for health workers in  
40 Australia. *Int J Qual Health Care* 2011; 23(3):247-257 doi: 10.1093/intqhc/mzr008  
41  
42  
43  
44  
45  
46  
47  
48  
49  
50  
51  
52  
53  
54  
55  
56  
57  
58  
59  
60

- 1  
2  
3 15. Council of Australian Governments. National Indigenous reform agreement (closing  
4 the gap). 2008.  
5  
6  
7  
8 [https://view.officeapps.live.com/op/view.aspx?src=http%3A%2F%2Fwww.federalfinancialrelations.gov.au%2Fcontent%2Fnpa%2Fhealth%2F\\_archive%2Findigenous-reform%2Fnational-agreement\\_sept\\_12.docx](https://view.officeapps.live.com/op/view.aspx?src=http%3A%2F%2Fwww.federalfinancialrelations.gov.au%2Fcontent%2Fnpa%2Fhealth%2F_archive%2Findigenous-reform%2Fnational-agreement_sept_12.docx) (accessed 28 Feb 2021)  
9  
10  
11  
12
- 13  
14 16. Australian Government. National Indigenous agency marks a new era of co-design  
15 and partnership. 2019, Jul 1. <https://ministers.pmc.gov.au/wyatt/2019/national-indigenous-agency-marks-new-era-co-design-and-partnership> (accessed 28 Feb 2021)  
16  
17  
18  
19  
20
- 21 17. Singer J, Bennett-Levy J, Rotumah D. “You didn’t just consult community, you  
22 involved us”: transformation of a ‘top-down’ Aboriginal mental health project into a  
23 ‘bottom-up’ community-driven process. *Australasian Psychiatry* 2015; 23(6):614-619  
24  
25  
26  
27  
28  
29  
30  
31  
32  
33  
34  
35  
36  
37  
38  
39  
40  
41  
42  
43  
44  
45  
46  
47  
48  
49  
50  
51  
52  
53  
54  
55  
56  
57  
58  
59  
60  
doi: 10.1177%2F1039856215614985
18. Sherwood J, Edwards T. Decolonisation: a critical step for improving Aboriginal  
health. *Contemp Nurse* 2006; 22(2):178-190 doi: 10.5172/conu.2006.22.2.178
19. Wright M, et al. Looking forward Aboriginal mental health project final report 2011-  
2015. Perth, Western Australia: Telethon Kids Institute; 2015.  
<https://waamh.org.au/assets/documents/sector-development/lfp-final-research-report-2015---ecopy.pdf> (accessed 28 Feb 2021)
20. Tuhiwai-Smith L. Decolonizing methodologies: research for Indigenous peoples. 2nd  
ed. London: Zed Books; 2012.
21. Wright M, et al. Building bridges community report 2018. Perth, Western Australia:  
Curtin University; 2018. [https://91cf4966-a774-44ef-8bd3-79a653cb3a77.filesusr.com/ugd/23cdd3\\_315242bcf6c8405da6861ecb9e972bcd.pdf](https://91cf4966-a774-44ef-8bd3-79a653cb3a77.filesusr.com/ugd/23cdd3_315242bcf6c8405da6861ecb9e972bcd.pdf)  
(accessed 28 Feb 2021)

- 1  
2  
3  
4  
5  
6  
7  
8  
9  
10  
11  
12  
13  
14  
15  
16  
17  
18  
19  
20  
21  
22  
23  
24  
25  
26  
27  
28  
29  
30  
31  
32  
33  
34  
35  
36  
37  
38  
39  
40  
41  
42  
43  
44  
45  
46  
47  
48  
49  
50  
51  
52  
53  
54  
55  
56  
57  
58  
59  
60
22. Wright M, Lin A, O'Connell M. Humility, inquisitiveness, and openness: key attributes for meaningful engagement with Nyoongar people. *Advances in Mental Health*. 2016; 14(2):82-95.
  23. Styres SD. Land as first teacher: a philosophical journeying. *Reflective Practice* 2011; 12(6):717-731 doi: 10.1080/14623943.2011.601083
  24. Chino M, Debruyne L. Building true capacity: Indigenous models for Indigenous communities. *Am J Public Health* 2006; 96(4):596-599 doi: 10.2105/AJPH.2004.053801
  25. Wright M. Research as intervention: engaging silenced voices. *Action Learning Action Research Journal* 2011; 17(2):25-46.
  26. Kovach M. Situating anti-oppressive theories within critical and difference-centred perspectives. In: Brown L, Strega S, editors. *Research as Resistance: Revisiting Critical, Indigenous, and Anti-Oppressive Approaches*. Toronto, ON: Canadian Scholars' Press; 2005.
  27. Minkler M, Wallerstein N, eds. *Community-based participatory research for health: from process to outcomes*. 2nd ed. San Francisco: Jossey-Bass; 2010.
  28. Dudgeon P, Bray A, Darlaston-Jones D, Walker R. *Aboriginal participatory action research: and Indigenous research methodology strengthening decolonisation and social and emotional wellbeing*. Melbourne: The Lowitja Institute; 2020.  
<https://www.lowitja.org.au/page/services/resources/Cultural-and-social-determinants/mental-health/aboriginal-participatory-action-research-an-indigenous-research-methodology-strengthening-decolonisation-and-social-and-emotional-wellbeing> (accessed 28 Feb 2021)
  29. Braun V, Clarke V. Using thematic analysis in psychology. *Qual Res Psychol* 2006; 3(2):77-101 doi: 10.1191/1478088706qp063oa

- 1  
2  
3 30. Graneheim U., Lindgren BM, and Lundman B. Methodological challenges in  
4 qualitative content analysis: a discussion paper. *Nurse Educ Today* 2017; 56:29 doi:  
5 10.1016/j.nedt.2017.06.002  
6  
7  
8  
9  
10 31. Bessarab D, Ng'andu B. Yarning about yarning as a legitimate method in Indigenous  
11 research. *Int J Crit Indig* 2010.3(1):37-50 doi: 10.5204/ijcis.v3i1.57  
12  
13  
14 32. National Health and Medical Research Council. Ethical conduct in research with  
15 Aboriginal and Torres Strait Islander peoples and communities: guidelines for  
16 researchers and stakeholders. Canberra: Commonwealth of Australia; 2018.  
17  
18  
19  
20  
21 [https://www.nhmrc.gov.au/about-us/resources/ethical-conduct-research-aboriginal-](https://www.nhmrc.gov.au/about-us/resources/ethical-conduct-research-aboriginal-and-torres-strait-islander-peoples-and-communities)  
22 [and-torres-strait-islander-peoples-and-communities](https://www.nhmrc.gov.au/about-us/resources/ethical-conduct-research-aboriginal-and-torres-strait-islander-peoples-and-communities) (accessed 28 Feb 2021)  
23  
24  
25  
26 33. National Health and Medical Research Council. Keeping research on track II: a  
27 companion document to ethical conduct in research with Aboriginal and Torres Strait  
28 Islander peoples and communities: guidelines for researchers and stakeholders.  
29 Canberra: Commonwealth of Australia; 2018. [https://www.nhmrc.gov.au/about-](https://www.nhmrc.gov.au/about-us/resources/keeping-research-track-ii)  
30 [us/resources/keeping-research-track-ii](https://www.nhmrc.gov.au/about-us/resources/keeping-research-track-ii) (accessed 28 Feb 2021)  
31  
32  
33  
34  
35  
36  
37  
38  
39  
40  
41  
42  
43  
44  
45  
46  
47  
48  
49  
50  
51  
52  
53  
54  
55  
56  
57  
58  
59  
60

1  
2  
3 Figure 1: Steady Walking Talking Co-Design Framework  
4

5 Figure 2: Project timeline  
6

7  
8 Figure 3: Map of Western Australia with current sites  
9

10  
11  
12  
13  
14  
15  
16  
17  
18  
19  
20  
21  
22  
23  
24  
25  
26  
27  
28  
29  
30  
31  
32  
33  
34  
35  
36  
37  
38  
39  
40  
41  
42  
43  
44  
45  
46  
47  
48  
49  
50  
51  
52  
53  
54  
55  
56  
57  
58  
59  
60

For peer review only

Figure 1: Steady Walking Talking Co-Design Framework

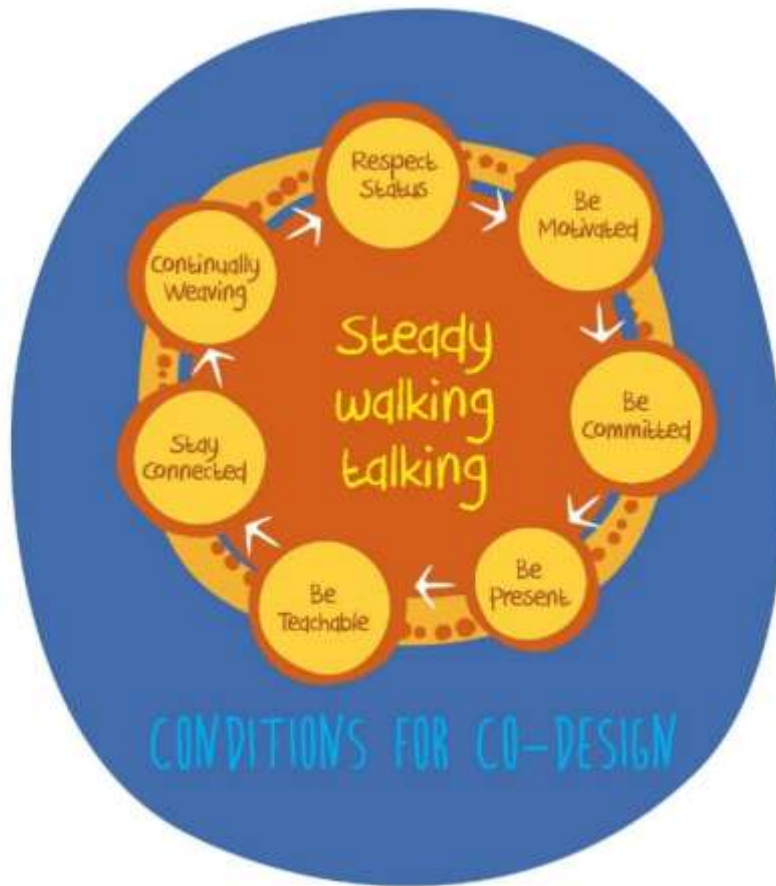

new only



Figure 2: Project timeline

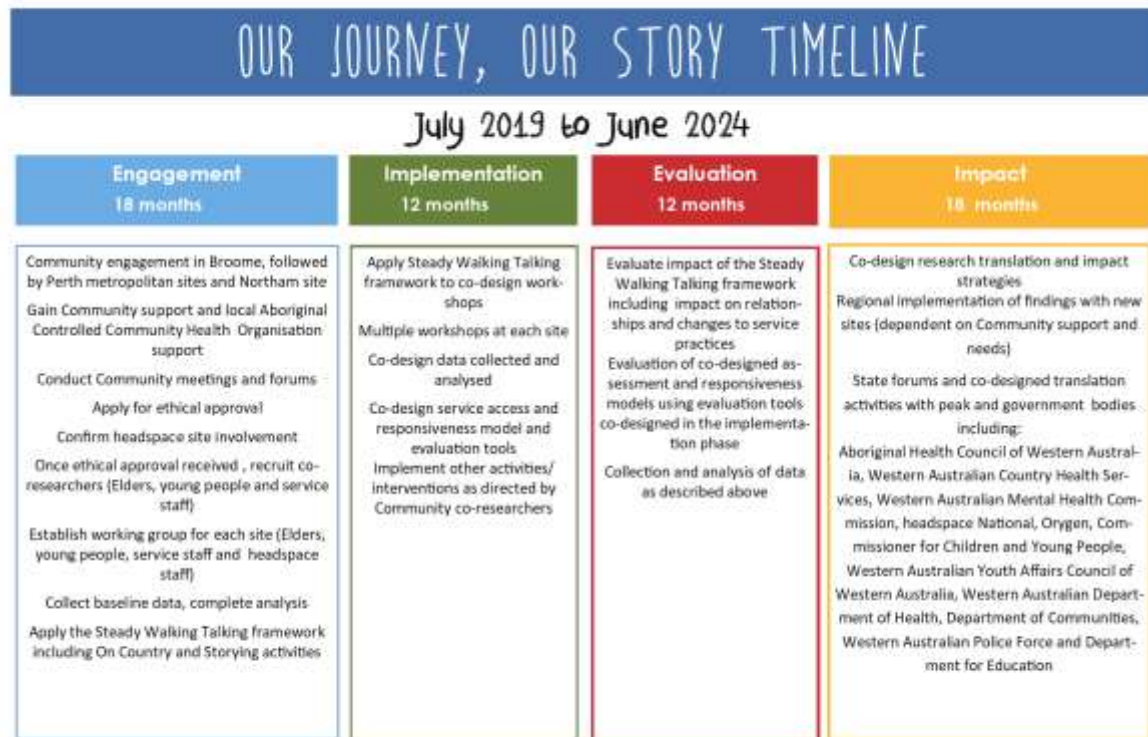

view only

**Figure 3: Map of Western Australia with research sites**

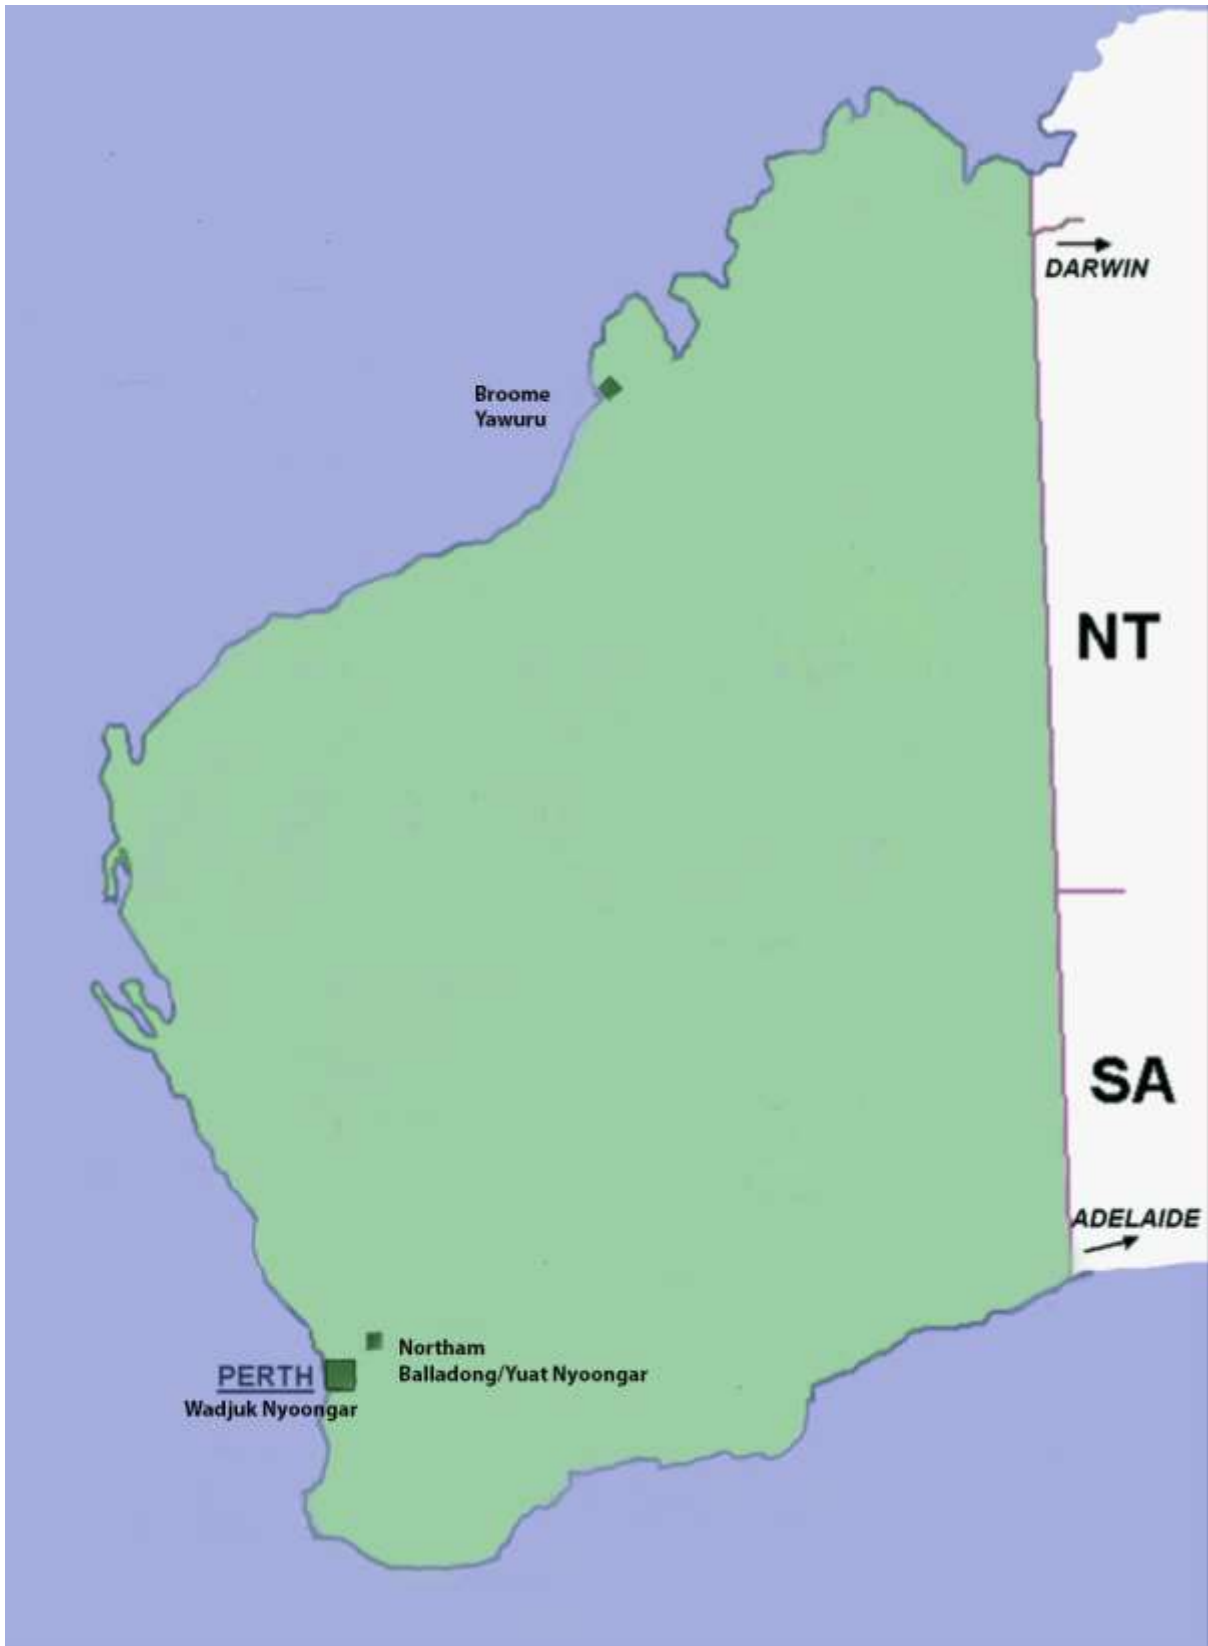

Supplement: bmjopen-2020-042981.draft_revisions.pdf [file bmjopen-2020-042981.draft_revisions.pdf]
